# Supplementary material for: Genomic diversity generated by a transposable element burst in a rice recombinant inbred population
Source: PubMed Central journal article supplement — Proc Natl Acad Sci U S A. 2020 Oct 5;117(42):26288–97. doi: 10.1073/pnas.2015736117 (PMC7584900; doi:10.1073/pnas.2015736117), 2020-10-05
Supplement: pnas.2015736117.sapp.pdf [file pnas.2015736117.sapp.pdf]

## Supplementary Tables/Figures

Title: Genomic diversity generated by a transposable element burst in a rice recombinant inbred population

Short title: *mPing* burst in a rice recombinant inbred population

Authors: Jinfeng Chen<sup>a,b,1</sup>, Lu Lu<sup>a,1</sup>, Sofia M.C. Robb<sup>a,b</sup>, Matthew Collin<sup>a,c</sup>, Yutaka Okumoto<sup>d</sup>, Jason E. Stajich<sup>b,c</sup>, and Susan R. Wessler<sup>a,c,2</sup>

Affiliations:

<sup>a</sup> Department of Botany and Plant Sciences, University of California, Riverside, CA 92521, USA.

<sup>b</sup> Department of Microbiology and Plant Pathology, University of California, Riverside, CA 92521, USA.

<sup>c</sup> Institute for Integrative Genome Biology, University of California, Riverside, CA 92521, USA.

<sup>d</sup> Graduate School of Agriculture, Kyoto University, Kitashirakawa-oiwake Sakyo, Kyoto 606-8502, Japan.

<sup>1</sup>J.C. and L.L. contributed equally to this work.

<sup>2</sup>To whom correspondence should be addressed. E-mail:

susan.wessler@ucr.edu (SRW)

Keywords: *mPing*, active transposon, transposition, recombinant inbred lines, excision, sequence rearrangement, structural variation

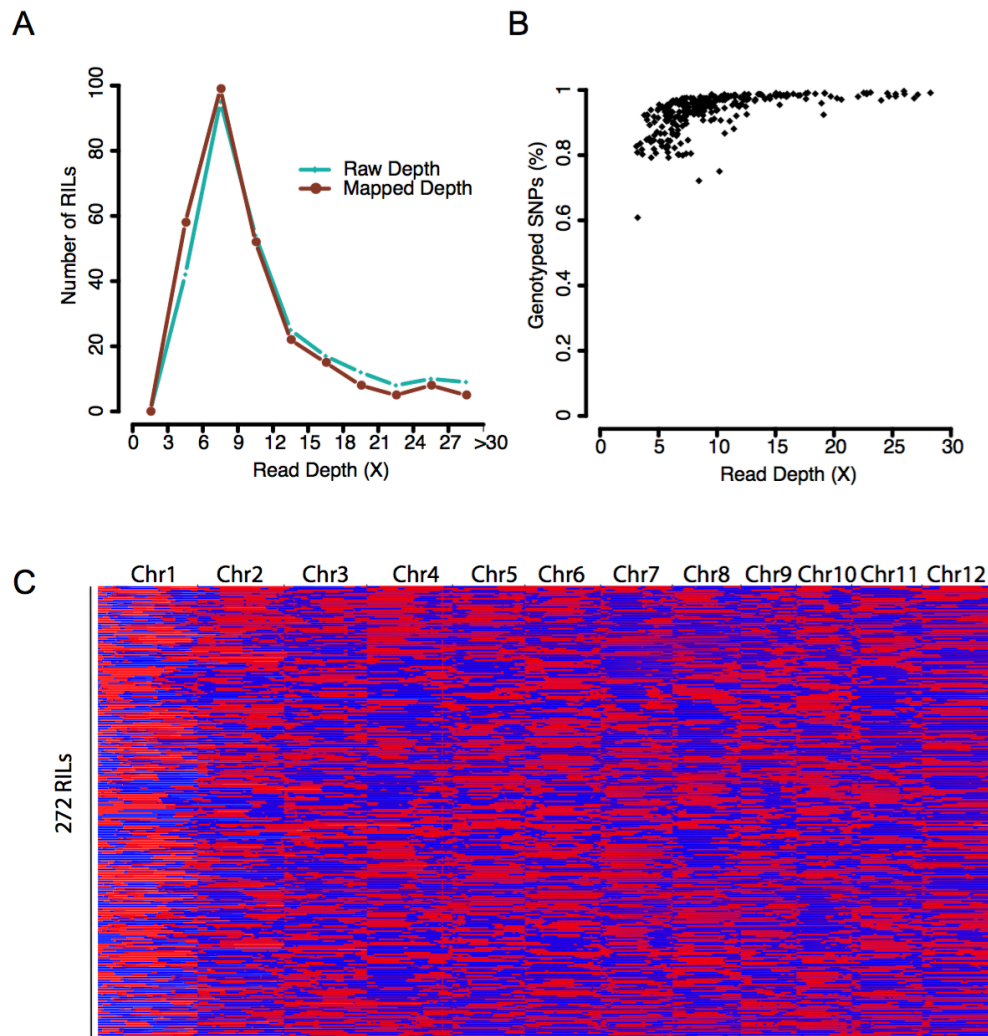

**Supplementary Figure 1. Sequencing features and genotypes of 272 RILs.** **A**, Sequence depth of 272 RILs. **B**, Genotyping rate of parental SNPs in the RILs. Reads were aligned to rice reference genome (MSUv7) by BWA and SNPs between parental strains were genotyped based on the alignments using GATK. **C**, Recombination map of RILs. Recombination bins were constructed using the high-quality genotype data in the RIL based on an HMM method. A comprehensive recombination map was constructed by imputation of missing makers and refining boundaries of the recombination bin using the R/qtl package. Blue and red represent parental accessions HEG4 and Nipponbare, respectively.

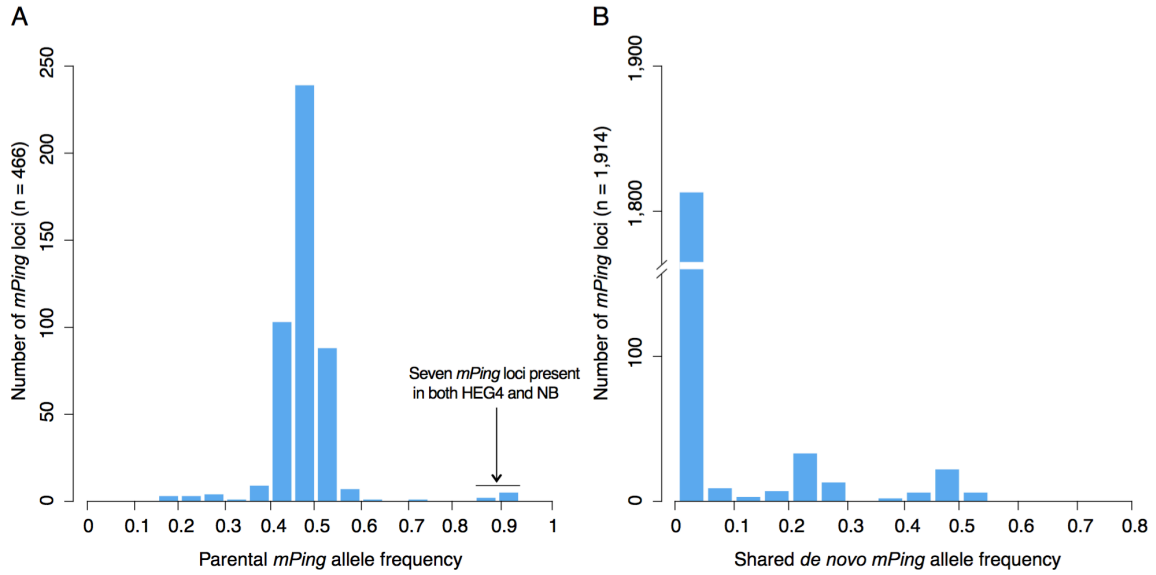

**Supplementary Figure 2. Allele frequency of parental and shared *mPing* loci.** **A**, Allele frequencies of parental *mPing* loci in 272 RILs. A total of 466 parental *mPing* loci (7 shared, 44 in NB, and 415 in HEG4) were used to calculate allele frequencies. **B**, Allele frequencies of shared *mPing* loci in 272 RILs. A total of 1,914 shared *de novo mPing* loci that are present in multiple RILs but not in HEG4 and NB were used to calculate the allele frequency.

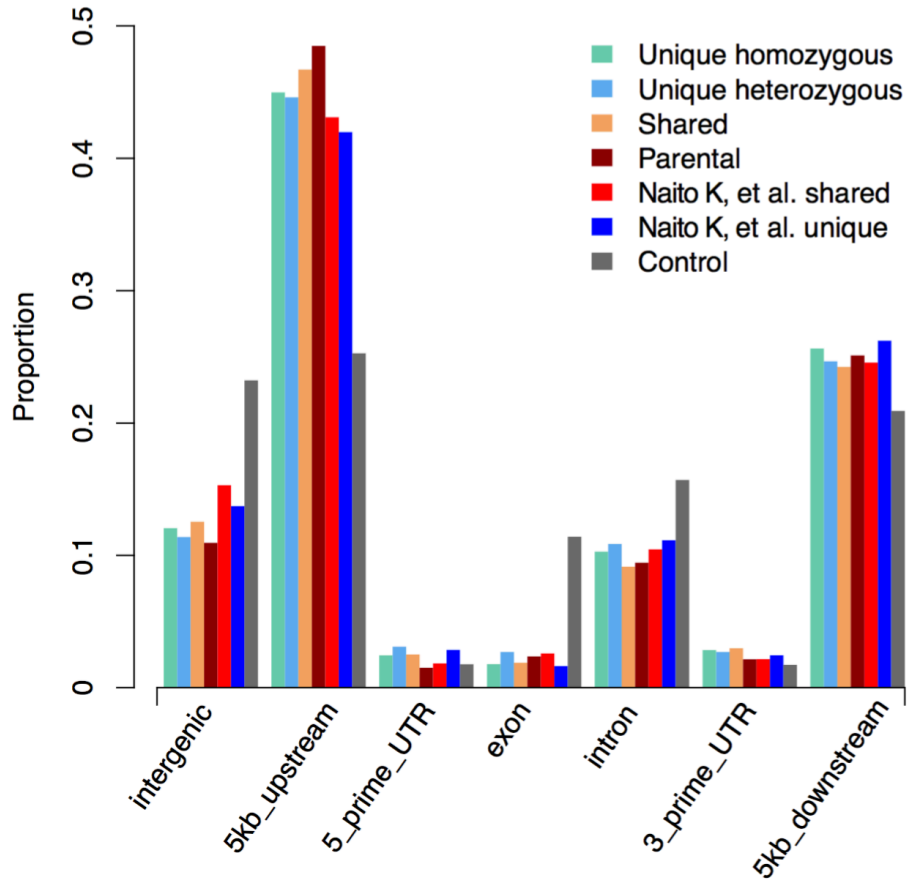

**Supplementary Figure 3. Distribution of *mPing* insertion sites in RILs compared to Naito K, et al, 2009.** *mPing* insertion sites are summarized according to their relative positions in and near protein-coding genes. Unique homozygous, unique heterozygous represent homozygous and heterozygous *mPing* insertion sites present exclusively in a single RIL. Shared represents insertion sites in multiple RILs but not in parents. Parental insertion sites are insertion sites shared in RILs and parents. Naito K, et al. shared are insertion sites in multiple individuals in Naito K, et al, 2009. Naito K, et al. unique are insertion sites in a single individual. Control is a random sampling from genomic sequence (n = 3,000).

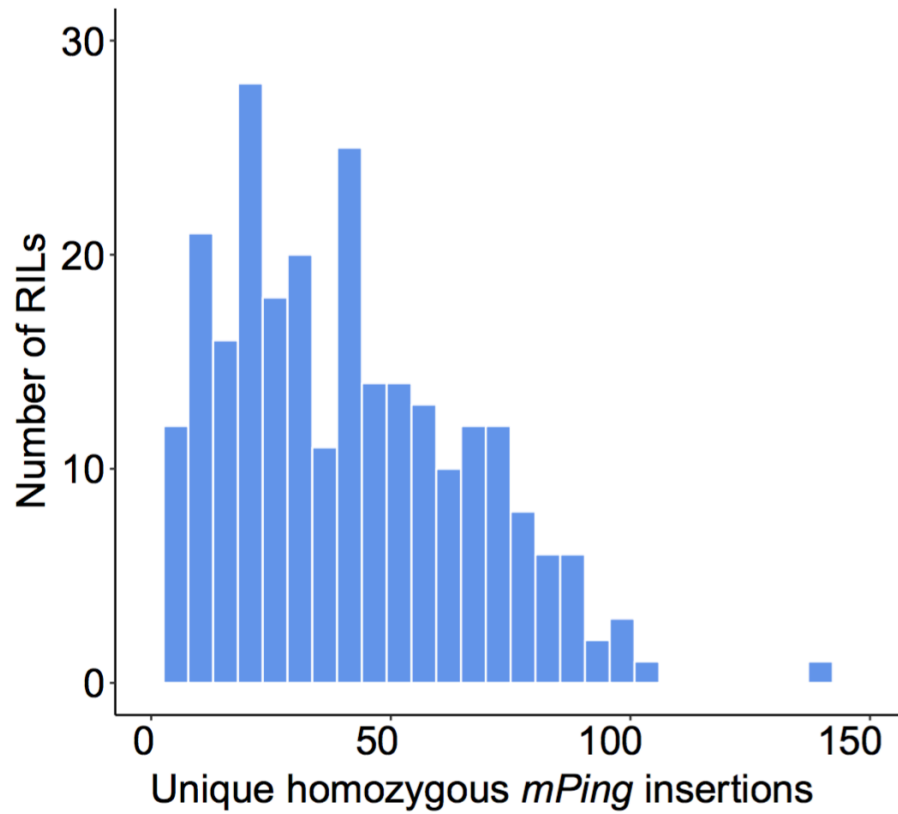

**Supplementary Figure 4. Distribution of the number of unique homozygous *mPing* insertions vs. the number of RILs with that number of new insertions.**

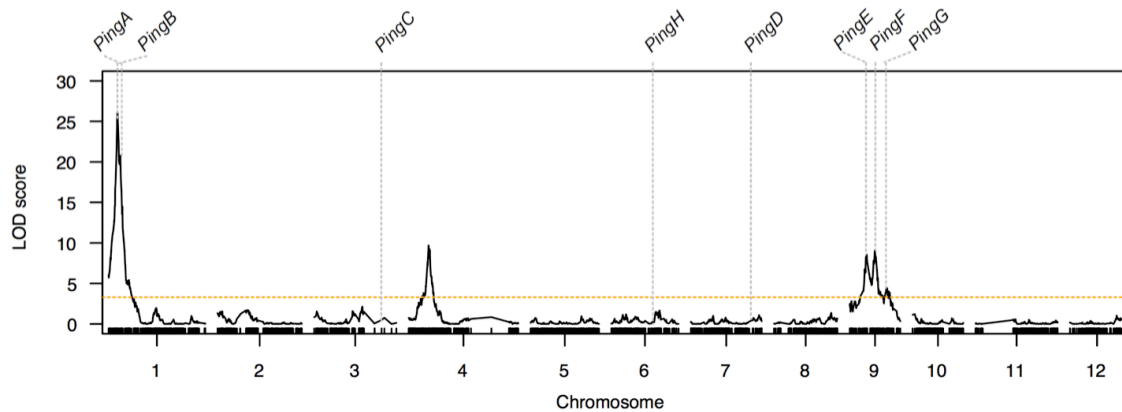

**Supplementary Figure 5. Mapped genetic loci impacting *mPing* transposition activity in the RILs.** Unique homozygous *mPing* insertions in RILs were used as the quantitative trait and recombination bins as markers. Markers along chromosomes are shown on the X axis and logarithm of the odds ratio (LOD score) of the QTL mapping along the Y axis. Orange dashed line indicates the threshold of the LOD score estimated by a permutation test (1,000 permutations,  $P = 0.05$ ). *Ping* loci are shown (A -H).

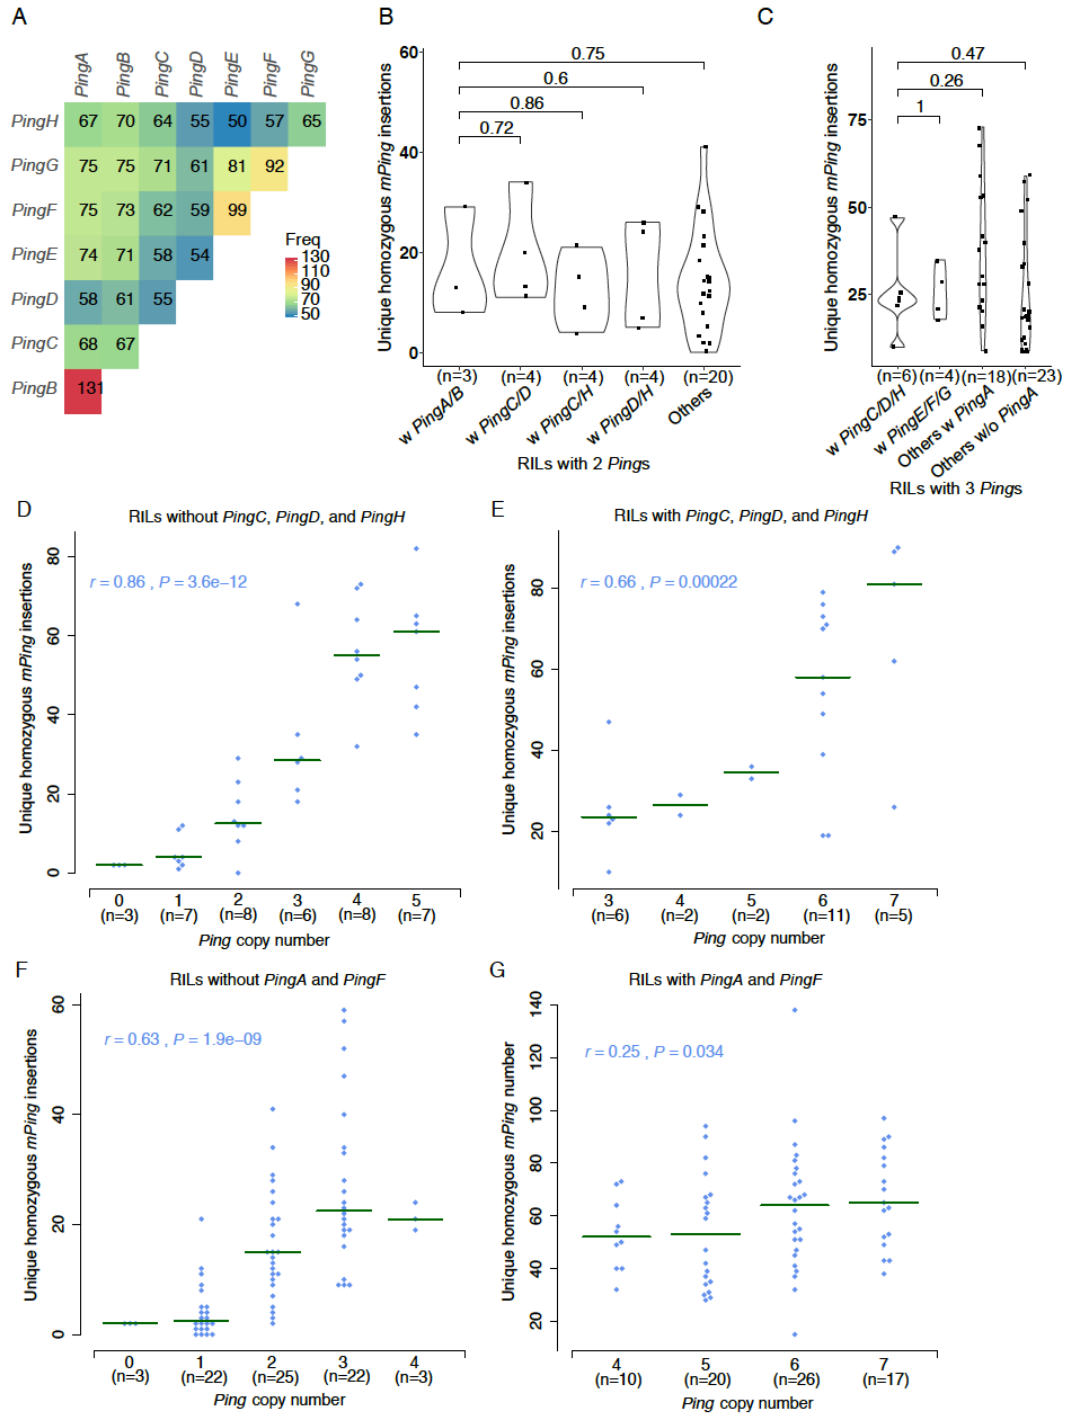

**Supplementary Figure 6. Comparison of unique homozygous *mPing* insertions in RILs with different *Ping* combinations.** **A**, Number of pairwise *Ping* combination in RILs. **B-C**, Comparison of dosage effect of *PingC*, *PingD*, *PingH* on *mPing* transposition in RILs with 2 *Pings* (**B**) or 3 *Pings* (**C**). The difference between groups was tested by Mann-Whitney test and indicated by *P* value. **D-E**, Correlation between unique homozygous *mPing* insertions and *Ping* copy number in the RILs without (**D**) or with *PingC*, *PingD*, and *PingH* (**E**). **F-G**, Correlation between unique homozygous *mPing* insertions and *Ping* copy

number in the RILs without (**F**) or with *PingA* and *PingF* (**G**). The 272 RILs were grouped by *Ping* copy number ranging from 0 to 7 and the scatterplot shows the number of unique *mPing* insertions in each group. The number of RILs in each group is in parentheses (n=). Green lines are the group median. The significance of correlation was tested by a two-tailed Pearson's correlation test and indicated by *P* value.



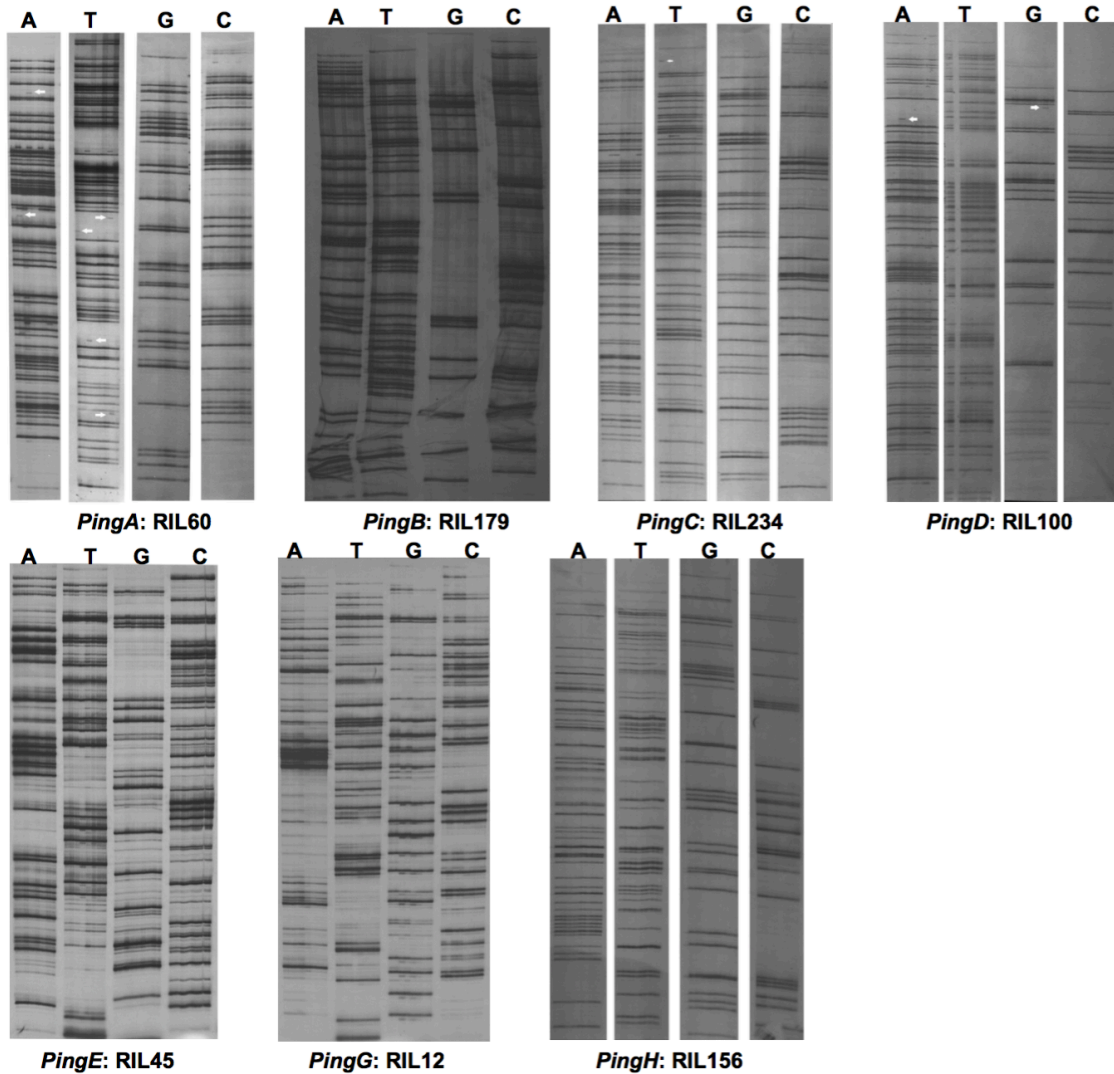

**Supplementary Figure 7. Transposon display analysis of *mPing* transposition in single-*Ping* RILs.** Genomic DNA of each plant was extracted and digested with *MseI*, ligated with an adapter and two rounds of PCR amplification performed with preselective primers (*MseI* + 0 and *mPing* P1) followed by four sets of selective primers (*MseI* + A/T/G/C and *mPing* P2). Each panel contains 8 lanes – one for each plant analyzed. For each RIL, bands were compared within each selective primer set and new bands (indicated by white arrow) were counted if present in only one plant.

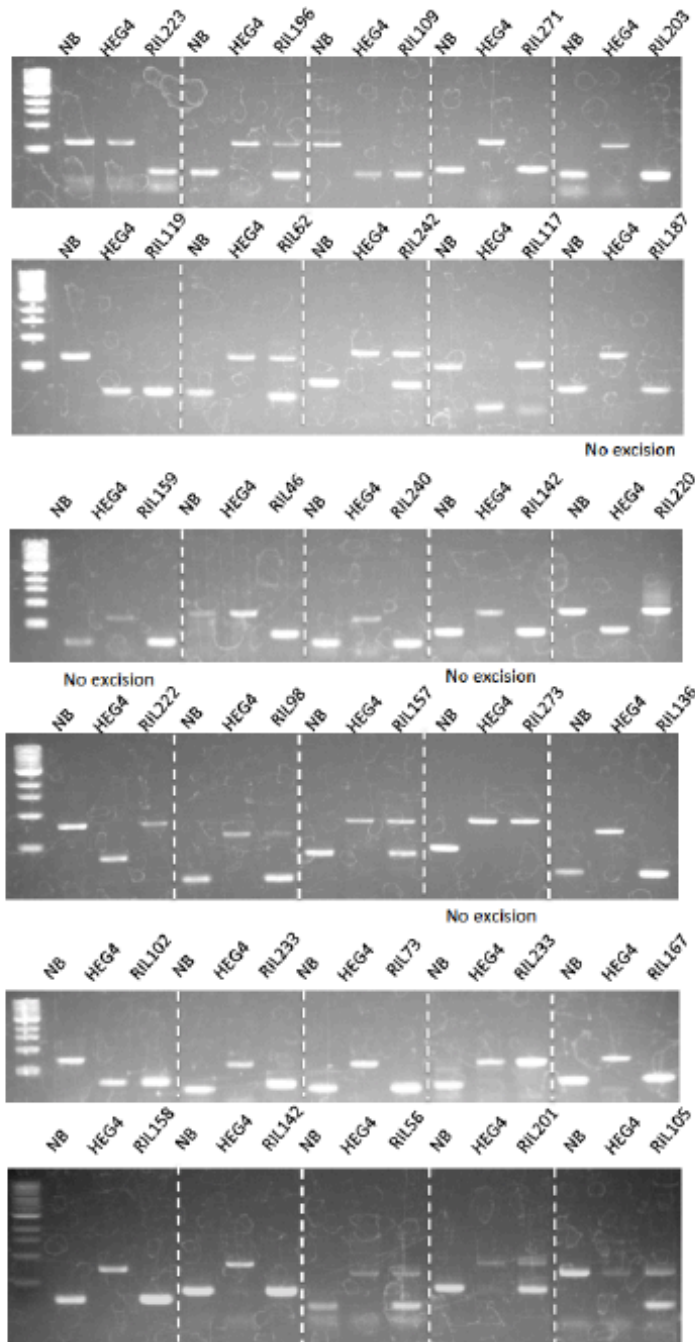

**Supplementary Figure 8.** PCR validation of 30 *mPing* excision events. Among excised *mPing* loci, 21 from HEG4 and 9 from NB (both specific and shared) were randomly selected to validate the accuracy of the excision identification method. Forward and reverse primers are in Supplementary Data 4.

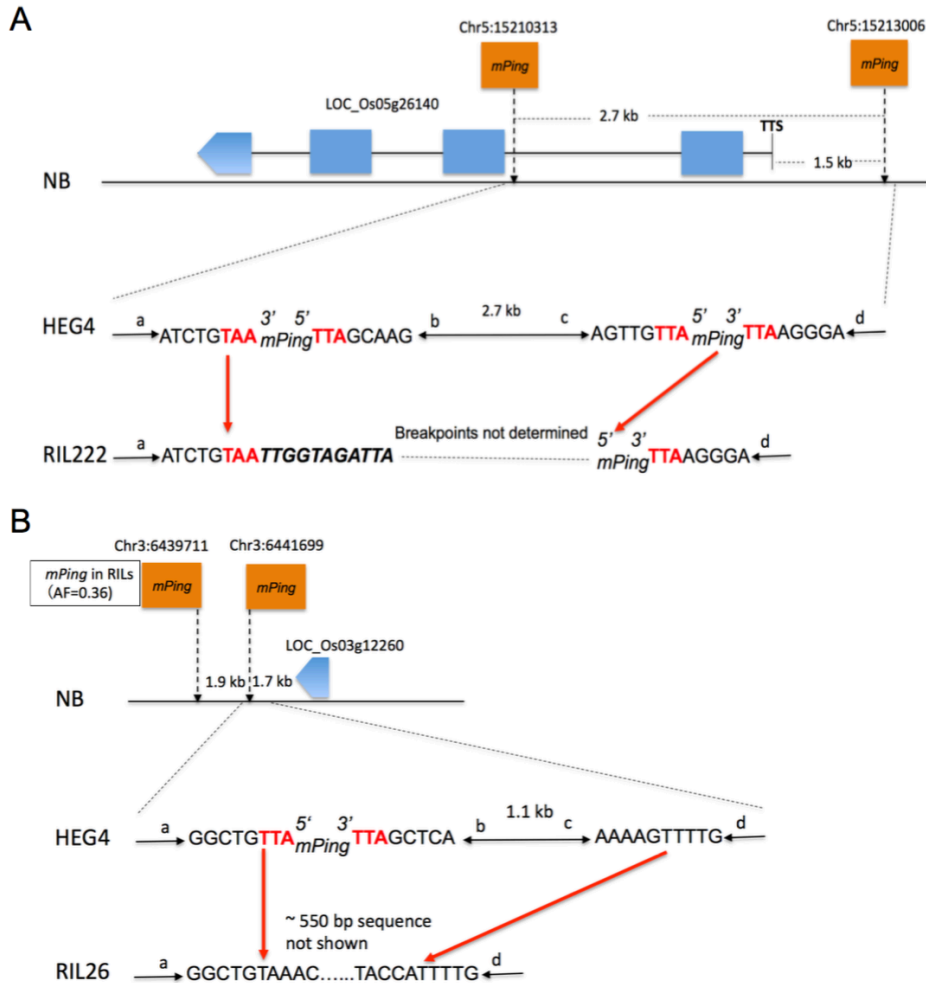

**Supplementary Figure 9. Structural variations mediated by *mPing* elements. A, SV5. B, SV3. *mPing*-associated structural variations in select RILs were aligned with either Nipponbare (NB) or HEG4 based on the chromosome of origin. Lines indicate DNA fragments flanking *mPing* insertions or the breakpoint of structural variation. Letters (a-d) on lines label the DNA fragment end. Orange boxes indicate *mPing* insertions. Blue boxes indicate exons of protein-coding genes. Target site duplications (TSDs) of *mPing* insertions are highlighted in red. Filler DNA at breakpoints is italicized. Red arrows indicate the breakpoints where structural variation occurred. Allele frequency (AF) is indicated if *mPing* is present in RILs but absent in parental accessions.**

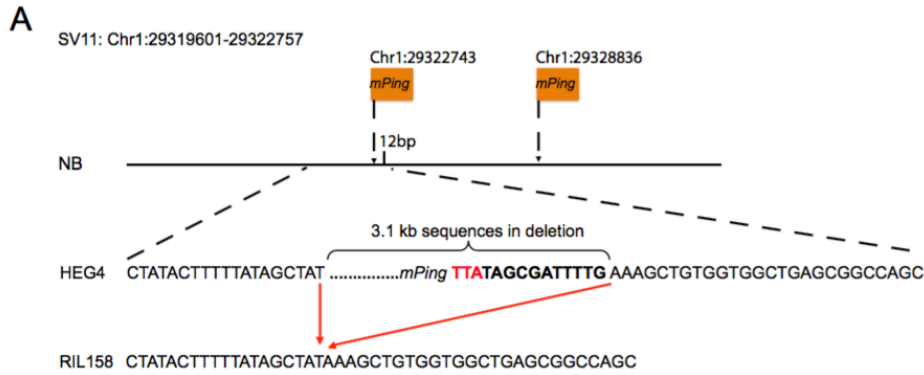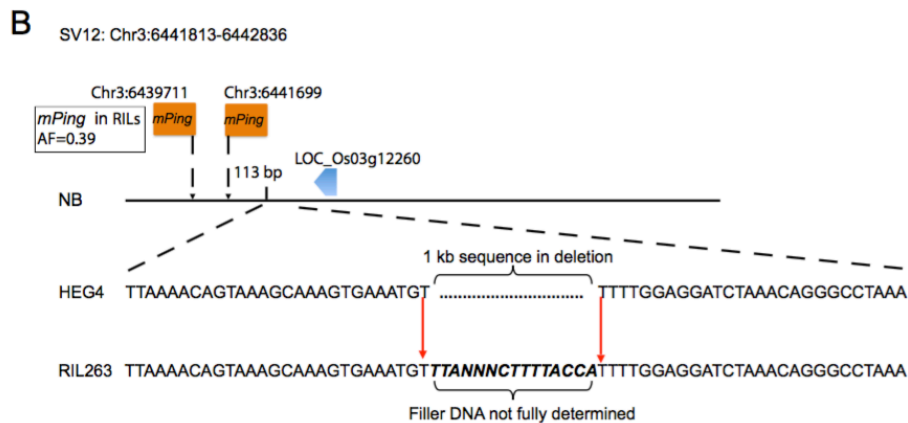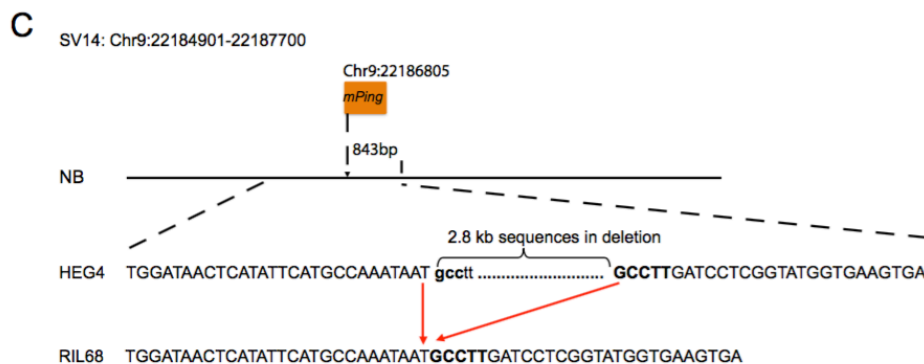

**Supplementary Figure 10. Structural variations with *mPing* elements nearby but not at breakpoints. A, SV11. B, SV12. C, SV14.** *mPing*-associated structural variations in select RILs were aligned with either Nipponbare (NB) or HEG4 based on the chromosome of origin. Orange boxes indicate *mPing* insertions. Blue boxes indicate exons of protein-coding genes. Target site duplications (TSDs) of *mPing* insertions are highlighted in red. Filler DNA at breakpoints are italicized. Red arrows indicate the breakpoints where structural variation occurred. Allele frequency (AF) is indicated if *mPing* is present in RILs but absent in parental accessions.

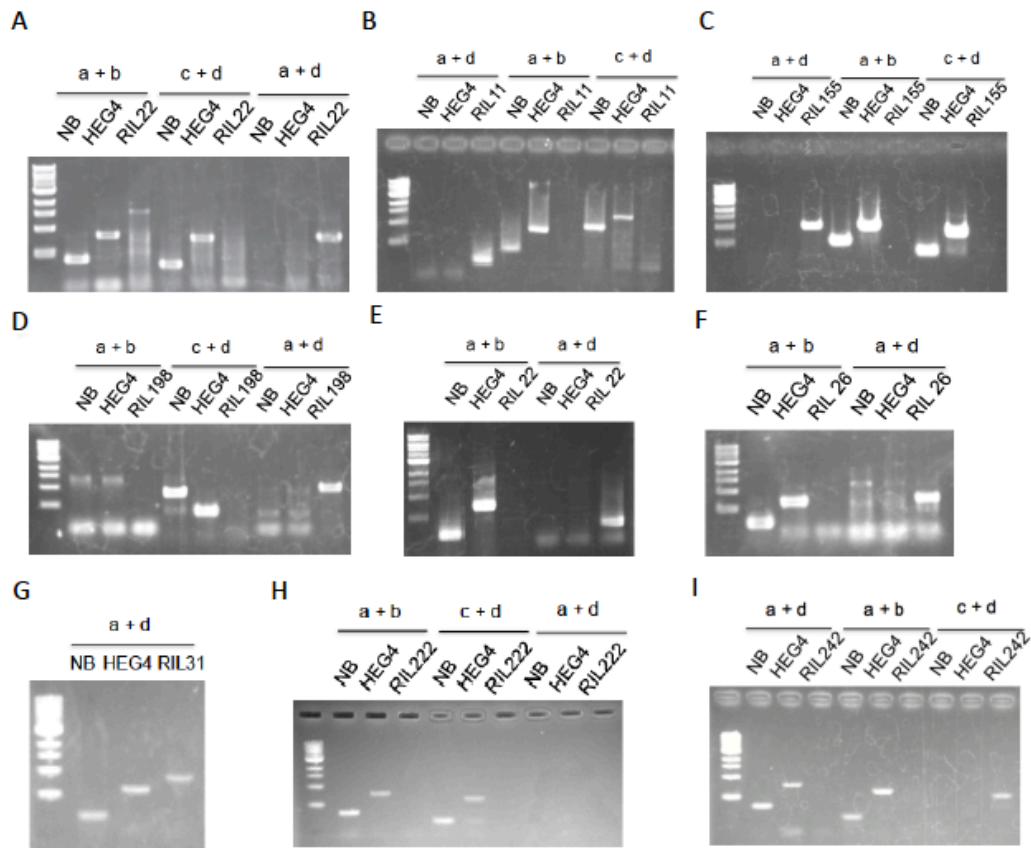

**Supplementary Figure 11.** PCR validation of *mPing*-associated sequence rearrangements shown in Figure 5 and Supplementary Figure 6. **A**, SV1. **B**, SV2. **C**, SV7. **D**, SV9. **E**, SV8. **F**, SV3. **G**, SV4. **H**, SV5. **I**, SV6. Forward and reverse primers are indicated by letters (a-d) as shown in Figure 5 and Supplementary Figure 6.

**Supplementary Table 1. Recombination bin map of 272 RILs**

| Chromosome   | Number of bins | Average bin size (kb) | Average genetic distance (cM) | Total genetic distance (cM) | Physical length (Mb) | Recombination rate (cM/Mb) |
|--------------|----------------|-----------------------|-------------------------------|-----------------------------|----------------------|----------------------------|
| Chr1         | 343            | 119.81                | 0.57                          | 196.25                      | 43.27                | 4.54                       |
| Chr2         | 264            | 135.00                | 0.65                          | 170.98                      | 35.94                | 4.76                       |
| Chr3         | 163            | 209.20                | 1.02                          | 166.90                      | 36.41                | 4.58                       |
| Chr4         | 275            | 128.33                | 0.81                          | 222.42                      | 35.50                | 6.27                       |
| Chr5         | 217            | 137.64                | 0.64                          | 138.91                      | 29.96                | 4.64                       |
| Chr6         | 194            | 160.73                | 0.70                          | 136.41                      | 31.25                | 4.37                       |
| Chr7         | 248            | 119.26                | 0.58                          | 143.77                      | 29.70                | 4.84                       |
| Chr8         | 186            | 151.83                | 0.69                          | 128.71                      | 28.44                | 4.53                       |
| Chr9         | 122            | 187.18                | 0.84                          | 102.68                      | 23.01                | 4.46                       |
| Chr10        | 175            | 130.29                | 0.59                          | 102.82                      | 23.21                | 4.43                       |
| Chr11        | 220            | 131.89                | 0.76                          | 166.42                      | 29.02                | 5.73                       |
| Chr12        | 165            | 166.82                | 0.67                          | 110.12                      | 27.53                | 4.00                       |
| Mean (Total) | 214 (2572)     | 142.76                | 0.69                          | 148.86 (1786)               | 31.10 (373)          | 4.79                       |

**Supplementary Table 2. Genotypes of SNPs flanking *de novo* *mPing* insertion sites**

| Flanking SNP genotype <sup>a</sup> | Heterozygous<br><i>mPings</i> | Homozygous<br><i>mPings</i> |
|------------------------------------|-------------------------------|-----------------------------|
| hom hom                            | 3129                          | 8361                        |
| -NB                                | 1312                          | 3500                        |
| -HEG4                              | 1429                          | 3700                        |
| -NB+HEG4                           | 123                           | 315                         |
| -Not determined                    | 265                           | 846                         |
| hom het                            | 89                            | 262                         |
| het het                            | 11                            | 6                           |
| Not determined                     | 778                           | 1898                        |
| Total                              | 4007                          | 10527                       |

<sup>a</sup>, hom|hom is where SNPs flanking both ends of *mPing* are homozygous. hom+het is where SNPs flanking one end of *mPing* are homozygous while the other end is heterozygous. het|het is where SNPs flanking both ends of *mPing* are heterozygous.

**Supplementary Table 3. *de novo* Ping insertions**

| New <i>Ping</i> locus | RIL | New homozygous (heterozygous) <i>mPing</i> | Nearest protein-coding genes | Location relative to closest protein-coding gene | Chromatin environment | All <i>Ping</i> loci in RIL where N = new <i>Ping</i> |
|-----------------------|-----|--------------------------------------------|------------------------------|--------------------------------------------------|-----------------------|-------------------------------------------------------|
| Chr3:865992           | 3   | 43 (4)                                     | LOC_Os03g02430.1             | -3215                                            | Euchromatin           | 7-NABCEFG                                             |
| Chr1:34194379         | 14  | 48 (29)                                    | LOC_Os01g59190.1             | 210                                              | Euchromatin           | 6-NCEFGH                                              |
| Chr8:18337647         | 26  | 42 (21)                                    | LOC_Os08g29809.1             | -7734<br>(intergenic)                            | TE island             | 5-NDEFG                                               |
| Chr2:28343688         | 46  | 73 (46)                                    | LOC_Os02g46490.1             | -2292                                            | Euchromatin           | 7-NABEFGH                                             |
| Chr2:1188028          | 51  | 67 (25)                                    | LOC_Os02g03020.1             | -86                                              | Euchromatin           | 6-NABDEF                                              |
| Chr1:7258553          | 65  | 62 (18)                                    | LOC_Os01g13040.1             | -1231                                            | Euchromatin           | 6-NABDEF                                              |
| Chr3:36131662         | 93  | 21 (9)                                     | LOC_Os03g63940.1             | Intron                                           | Euchromatin           | 4-NBGH                                                |
| Chr7:5440360          | 104 | 44 (7)                                     | LOC_Os07g10130.1             | Intron                                           | Euchromatin           | 4-NABH                                                |
| Chr10:13635022        | 149 | 52 (15)                                    | LOC_Os10g26290.1             | -20820<br>(intergenic)                           | TE island             | 3-NGH                                                 |
| Chr1:23216637         | 174 | 43 (15)                                    | LOC_Os01g41000.1             | -1340                                            | Euchromatin           | 7-NABDEFH                                             |
| Chr5:4075298          | 175 | 81 (23)                                    | LOC_Os05g07600.1             | -707                                             | Euchromatin           | 7-NABCDGH                                             |
| Chr9:18957569         | 189 | 38 (10)                                    | LOC_Os09g31458.1             | 76                                               | Euchromatin           | 8-NABCEFGH                                            |
| Chr11:22264027        | 211 | 73 (13)                                    | LOC_Os11g37680.1             | Intron                                           | Euchromatin           | 5-NABDH                                               |
| Chr7:22688057         | 221 | 70 (60)                                    | LOC_Os07g37830.1             | -841                                             | Euchromatin           | 7-NABEFGH                                             |
| Chr12:7386029         | 248 | 57 (20)                                    | LOC_Os12g13280.1             | Intron                                           | Euchromatin           | 6-NABFGH                                              |
| Chr11:4473183         | 270 | 96 (36)                                    | LOC_Os11g08470.1             | 3436                                             | TE island             | 6-NNEFGH                                              |
| Chr11:5885534         | 270 | 96 (36)                                    | LOC_Os11g10720.1             | -4005                                            | Euchromatin           | 6-NNEFGH                                              |



**Supplementary Table 4. QTL loci contributing to *mPing* activity**

| Chromosome | Genetic map position | Genetic map interval | Interval on chromosome | Fitted LOD | Variance explained by QTL | QTL effect | Standard deviation of QTL effect |
|------------|----------------------|----------------------|------------------------|------------|---------------------------|------------|----------------------------------|
| Chr1       | 17.92                | 17.18-20.40          | 2496808-3672310        | 29.65      | 28.19                     | 14.02      | 1.06                             |
| Chr4       | 40.28                | 38.54-43.42          | 15520048-16724166      | 14.27      | 11.82                     | 8.99       | 1.05                             |
| Chr9       | 50.95                | 31.88-54.16          | 10571059-14581359      | 10.93      | 8.79                      | 7.81       | 1.06                             |

**Supplementary Table 5. *mPing* transposition estimated by the transposon display approach**

| <i>Ping</i>  | RIL    | Number of individuals | New <i>mPing</i> insertions | New <i>mPing</i> insertions per plant |
|--------------|--------|-----------------------|-----------------------------|---------------------------------------|
| <i>PingA</i> | RIL60  | 8                     | 6                           | 0.75                                  |
| <i>PingA</i> | RIL60  | 8                     | 8                           | 1                                     |
| <i>PingA</i> | RIL60  | 8                     | 4                           | 0.5                                   |
| <i>PingB</i> | RIL179 | 8                     | 0                           | 0                                     |
| <i>PingB</i> | RIL179 | 8                     | 0                           | 0                                     |
| <i>PingB</i> | RIL179 | 8                     | 0                           | 0                                     |
| <i>PingC</i> | RIL230 | 8                     | 0                           | 0                                     |
| <i>PingC</i> | RIL230 | 8                     | 0                           | 0                                     |
| <i>PingC</i> | RIL230 | 8                     | 0                           | 0                                     |
| <i>PingC</i> | RIL234 | 8                     | 1                           | 0.125                                 |
| <i>PingC</i> | RIL234 | 8                     | 2                           | 0.25                                  |
| <i>PingC</i> | RIL234 | 8                     | 3                           | 0.375                                 |
| <i>PingD</i> | RIL75  | 8                     | 3                           | 0.375                                 |
| <i>PingD</i> | RIL75  | 8                     | 2                           | 0.25                                  |
| <i>PingD</i> | RIL75  | 8                     | 2                           | 0.25                                  |
| <i>PingD</i> | RIL100 | 8                     | 2                           | 0.25                                  |
| <i>PingD</i> | RIL100 | 8                     | 2                           | 0.25                                  |
| <i>PingD</i> | RIL100 | 8                     | 2                           | 0.25                                  |
| <i>PingE</i> | RIL45  | 8                     | 0                           | 0                                     |
| <i>PingE</i> | RIL45  | 8                     | 0                           | 0                                     |
| <i>PingE</i> | RIL45  | 8                     | 0                           | 0                                     |
| <i>PingE</i> | RIL268 | 8                     | 2                           | 0.25                                  |
| <i>PingE</i> | RIL268 | 8                     | 1                           | 0.125                                 |

|              |        |   |   |       |
|--------------|--------|---|---|-------|
| <i>PingE</i> | RIL268 | 8 | 1 | 0.125 |
| <i>PingG</i> | RII12  | 8 | 0 | 0     |
| <i>PingG</i> | RII12  | 8 | 0 | 0     |
| <i>PingG</i> | RII47  | 8 | 2 | 0.25  |
| <i>PingG</i> | RII47  | 8 | 2 | 0.25  |
| <i>PingG</i> | RII47  | 8 | 0 | 0     |
| <i>PingH</i> | RII156 | 8 | 0 | 0     |
| <i>PingH</i> | RII156 | 8 | 0 | 0     |
| <i>PingH</i> | RII166 | 8 | 0 | 0     |
| <i>PingH</i> | RII166 | 8 | 0 | 0     |
| <i>PingH</i> | RII166 | 8 | 0 | 0     |

---

**Supplementary Table 6. *mPing* transposition estimated by the pooled-sequencing approach**

| <i>Ping</i>  | RIL    | Replicate | Number of individuals | New <i>mPing</i> insertions | New <i>mPing</i> insertions per plant |
|--------------|--------|-----------|-----------------------|-----------------------------|---------------------------------------|
| <i>PingA</i> | RIL60  | Rep1      | 8                     | 2                           | 0.25                                  |
| <i>PingA</i> | RIL60  | Rep2      | 8                     | 6                           | 0.75                                  |
| <i>PingA</i> | RIL60  | Rep3      | 8                     | 11                          | 1.375                                 |
| <i>PingA</i> | RIL60  | Rep4      | 8                     | 12                          | 1.5                                   |
| <i>PingC</i> | RIL230 | Rep1      | 8                     | 0                           | 0                                     |
| <i>PingC</i> | RIL230 | Rep2      | 8                     | 0                           | 0                                     |
| <i>PingC</i> | RIL230 | Rep3      | 8                     | 0                           | 0                                     |
| <i>PingD</i> | RIL99  | Rep1      | 8                     | 1                           | 0.125                                 |
| <i>PingD</i> | RIL99  | Rep2      | 8                     | 0                           | 0                                     |
| <i>PingD</i> | RIL99  | Rep3      | 8                     | 0                           | 0                                     |
| <i>PingE</i> | RIL268 | Rep1      | 8                     | 2                           | 0.25                                  |
| <i>PingE</i> | RIL268 | Rep2      | 8                     | 0                           | 0                                     |
| <i>PingE</i> | RIL268 | Rep3      | 9                     | 0                           | 0                                     |
| <i>PingG</i> | RIL12  | Rep1      | 8                     | 0                           | 0                                     |
| <i>PingG</i> | RIL12  | Rep2      | 8                     | 1                           | 0.125                                 |
| <i>PingG</i> | RIL12  | Rep3      | 8                     | 0                           | 0                                     |
| <i>PingH</i> | RIL156 | Rep1      | 8                     | 0                           | 0                                     |
| <i>PingH</i> | RIL156 | Rep2      | 8                     | 0                           | 0                                     |
| <i>PingH</i> | RIL156 | Rep3      | 7                     | 1                           | 0.142857                              |

**Supplementary Table 7. Distance from high frequency excised *mPing* to nearest *mPing* insertion**

| <i>mPing</i> locus | # Excision event | Nearest <i>mPing</i> locus in HEG4 (kb) | Nearest <i>mPing</i> locus in RILs (kb) <sup>a</sup> |
|--------------------|------------------|-----------------------------------------|------------------------------------------------------|
| Chr1:29494572      | 5                | 165.7                                   | 165.7                                                |
| Chr1:3444992       | 5                | 335.8                                   | 335.8                                                |
| Chr1:36267659      | 5                | 2.8                                     | 2.8                                                  |
| Chr1:36270511      | 7                | 2.8                                     | 2.8                                                  |
| Chr1:6806761       | 7                | 9.6                                     | 9.6                                                  |
| Chr2:30934395      | 6                | 520.9                                   | 22.3                                                 |
| Chr3:6441699       | 8                | 70.3                                    | 1.9                                                  |
| Chr5:15210313      | 9                | 2.6                                     | 2.6                                                  |
| Chr5:15213006      | 10               | 2.6                                     | 2.6                                                  |
| Chr6:8316574       | 5                | 40                                      | 40                                                   |
| Chr8:13076782      | 6                | 26.3                                    | 26.3                                                 |
| Chr8:24622994      | 15               | 37.6                                    | 2.3                                                  |

<sup>a</sup>, 92 *mPing* loci are not parental but found in 10% or more of the RILs. These loci were also used to calculate the distance of *mPing* loci to their closest loci.

**Supplementary Table 8. Nearest protein-coding gene from high frequency excised *mPing***

| <i>mPing</i>  | Nearest protein-coding gene | Location relative to closest protein-coding gene | Gene expression difference (FDR) |
|---------------|-----------------------------|--------------------------------------------------|----------------------------------|
| Chr1:29494572 | LOC_Os01g51290.1            | -2016                                            | 1                                |
| Chr1:3444992  | LOC_Os01g07300.1            | -165                                             | 0                                |
| Chr1:36267659 | LOC_Os01g62630.1            | 402                                              | 1                                |
| Chr1:36270511 | LOC_Os01g62630.1            | -774                                             | 1                                |
| Chr1:6806761  | LOC_Os01g12440.1            | -6951                                            | 0.95                             |
| Chr2:30934395 | LOC_Os02g50640.1            | -104                                             | 0.75                             |
| Chr3:6441699  | LOC_Os03g12260.1            | 1752                                             | 1                                |
| Chr5:15210313 | LOC_Os05g26140.1            | Intron                                           | 1                                |
| Chr5:15213006 | LOC_Os05g26140.1            | -576                                             | 1                                |
| Chr6:8316574  | LOC_Os06g16740.1            | Intron                                           | 1                                |
| Chr8:13076782 | LOC_Os08g21840.1            | 721                                              | 1                                |
| Chr8:24622994 | LOC_Os08g38960.1            | -162                                             | 0.2                              |

**Supplementary Table 9. Features of structural variations in RILs**

| SV   | Chromosome | Start    | End      | RIL <sup>a</sup> | SV Type                | Length (bp) |
|------|------------|----------|----------|------------------|------------------------|-------------|
| SV1  | Chr1       | 29494474 | 29496305 | 22               | Deletion               | 1832        |
| SV2  | Chr2       | 28724476 | 28732623 | 11               | Deletion               | 8148        |
| SV3  | Chr3       | 6441699  | 6442836  | 26               | Deletion               | 1138        |
| SV4  | Chr3       | 6441699  | 6442399  | 31               | Deletion + Duplication | 701         |
| SV5  | Chr5       | 15210313 | 15213006 | 222              | Deletion               | 2694        |
| SV6  | Chr5       | 15210313 | 15213006 | 242              | Deletion               | 2694        |
| SV7  | Chr8       | 24622994 | 24625306 | 155              | Deletion               | 2313        |
| SV8  | Chr8       | 24625306 | 24634547 | 22               | Deletion               | 9242        |
| SV9  | Chr9       | 638901   | 694912   | 198              | Deletion               | 56012       |
| SV10 | Chr1       | 10145801 | 10151500 | 274              | Deletion               | 5700        |
| SV11 | Chr1       | 29319601 | 29322757 | 158              | Deletion               | 3157        |
| SV12 | Chr3       | 6441813  | 6442836  | 263              | Deletion               | 1024        |
| SV13 | Chr7       | 10749401 | 10760200 | 61               | Deletion               | 10800       |
| SV14 | Chr9       | 22184901 | 22187700 | 68               | Deletion               | 2800        |
| SV15 | Chr10      | 13066801 | 13068300 | 78               | Deletion               | 1500        |
| SV16 | Chr10      | 17891753 | 17895900 | 78               | Deletion               | 4148        |

<sup>a</sup>, RILs where structural variations were characterized and validated

**Supplementary Table 10. Presence or absence of structural variations in F1 progeny**

| SV   | Location                | # of RILs | F1 #26 progeny<br>(RIL1-139) | F1 #27 progeny<br>(RIL140-280) |
|------|-------------------------|-----------|------------------------------|--------------------------------|
| SV1  | Chr1:29494474-29496305  | 1         | 1                            | 0                              |
| SV2  | Chr2:28724476-28732623  | 1         | 1                            | 0                              |
| SV3  | Chr3:6441699-6442399    | 1         | 1                            | 0                              |
| SV4  | Chr3:6441699-6442836    | 1         | 1                            | 0                              |
| SV5  | Chr5:15210313-15213006  | 1         | 0                            | 1                              |
| SV6  | Chr5:15210313-15213006  | 1         | 0                            | 1                              |
| SV7  | Chr8:24622994-24625306  | 1         | 0                            | 1                              |
| SV8  | Chr8:24625306-24634547  | 1         | 1                            | 0                              |
| SV9  | Chr9:638901-694912      | 1         | 0                            | 1                              |
| SV10 | Chr1:10145801-10151500  | 67        | 0                            | 67                             |
| SV11 | Chr1:29319601-29322757  | 73        | 0                            | 73                             |
| SV12 | Chr3:6441813-6442836    | 1         | 0                            | 1                              |
| SV13 | Chr7:10749401-10760200  | 1         | 1                            | 0                              |
| SV14 | Chr9:22184901-22187700  | 1         | 1                            | 0                              |
| SV15 | Chr10:13066801-13068300 | 1         | 1                            | 0                              |
| SV16 | Chr10:17891753-17895900 | 1         | 1                            | 0                              |



**Supplementary Table 11. SVs that do/do not include high excision *mPings***

| <i>mPing</i> locus <sup>a</sup>        | High frequency excision <i>mPing</i> | Structural variation-associated <i>mPing</i> |
|----------------------------------------|--------------------------------------|----------------------------------------------|
| Chr1:29494572 (SV1)                    | +                                    | +                                            |
| Chr1:3444992                           | +                                    | -                                            |
| Chr1:36267659                          | +                                    | -                                            |
| Chr1:36270511                          | +                                    | -                                            |
| Chr1:6806761                           | +                                    | -                                            |
| Chr2:30934395                          | +                                    | -                                            |
| Chr3:6441699 (SV3 & SV4)               | +                                    | +                                            |
| Chr5:15210313 (SV5 & SV6)              | +                                    | +                                            |
| Chr5:15213006 (SV5 & SV6)              | +                                    | +                                            |
| Chr6:8316574                           | +                                    | -                                            |
| Chr8:13076782                          | +                                    | -                                            |
| Chr8:24622994 (SV7)                    | +                                    | +                                            |
| Chr8:24625306 (SV7 & SV8) <sup>b</sup> | -                                    | +                                            |
| Chr1:29496305 (SV1) <sup>c</sup>       | -                                    | +                                            |
| Chr8:28724476 (SV2)                    | -                                    | +                                            |
| Chr8:28732623 (SV2)                    | -                                    | +                                            |
| Chr3:6439711 (SV3 & SV4) <sup>d</sup>  | -                                    | +                                            |
| Chr9:694483 (SV9)                      | -                                    | +                                            |

<sup>a</sup>, SVs in parentheses have *mPing* at breakpoints

<sup>b</sup>, *mPing* locus Chr8:24625306 is in 97 RILs but not parents.

<sup>c</sup>, *mPing* locus Chr1:29496305 is characterized by PCR (Supplementary Figure 7A) but is not detected by RelocaTE2.

<sup>d</sup>, *mPing* locus Chr3:6439711 is in 107 RILs but not parents. It has 11 excision events and 10 of 11 with footprints.

**Supplementary Table 12. Protein-coding genes associated with SVs**

| Genes affected by structural variation | Gene annotation                 | Affected regions | Associated structural variation      |
|----------------------------------------|---------------------------------|------------------|--------------------------------------|
| LOC_Os01g18110                         | cinnamoyl CoA reductase         | exon and intron  | SV10                                 |
| LOC_Os01g18120                         | cinnamoyl CoA reductase         | exon and intron  | SV10                                 |
| LOC_Os01g51040                         | transmembrane protein 16K       | exon and intron  | SV11                                 |
| LOC_Os02g47060                         | WRKY66                          | full gene        | SV2 ( <i>mPing</i> associated)       |
| LOC_Os05g26140                         | expressed protein               | exon and intron  | SV5 & SV6 ( <i>mPing</i> associated) |
| LOC_Os07g18154                         | aldehyde oxidase                | exon and intron  | SV13                                 |
| LOC_Os08g38970                         | transmembrane receptor          | exon             | SV8 ( <i>mPing</i> associated)       |
| LOC_Os09g01960                         | MYB family transcription factor | full gene        | SV9 ( <i>mPing</i> associated)       |
| LOC_Os09g01970                         | expressed protein               | full gene        | SV9 ( <i>mPing</i> associated)       |
| LOC_Os09g02000                         | expressed protein               | full gene        | SV9 ( <i>mPing</i> associated)       |

**Supplementary Table 13. *mPing* excision events detected by conservative vs. standard methods**

| <i>mPing</i>  | Conservative method |                      | Standard method |                      | Shared high frequency excision <i>mPing</i> |
|---------------|---------------------|----------------------|-----------------|----------------------|---------------------------------------------|
|               | Excision events     | Event with footprint | Excision events | Event with footprint |                                             |
| Chr8:24622994 | 15                  | 14                   | 28              | 14                   | +                                           |
| Chr5:15213006 | 10                  | 9                    | 14              | 9                    | +                                           |
| Chr5:15210313 | 9                   | 8                    | 18              | 9                    | +                                           |
| Chr3:6441699  | 8                   | 7                    | 19              | 8                    | +                                           |
| Chr1:36270511 | 7                   | 6                    | 19              | 7                    | +                                           |
| Chr1:6806761  | 7                   | 6                    | 10              | 9                    | +                                           |
| Chr2:30934395 | 6                   | 5                    | 8               | 5                    | +                                           |
| Chr8:13076782 | 6                   | 5                    | 6               | 5                    | +                                           |
| Chr1:36267659 | 5                   | 4                    | 18              | 4                    | +                                           |
| Chr1:3444992  | 5                   | 4                    | 8               | 4                    | +                                           |
| Chr1:29494572 | 5                   | 4                    | 7               | 4                    | +                                           |
| Chr6:8316574  | 5                   | 5                    | 6               | 6                    | +                                           |
| Chr2:14601853 | 4                   | 3                    | 11              | 3                    | -                                           |
| Chr2:28732623 | 4                   | 3                    | 6               | 5                    | -                                           |
| Chr7:29475470 | 4                   | 3                    | 6               | 4                    | -                                           |
| Chr2:30104937 | 3                   | 2                    | 6               | 3                    | -                                           |
| Chr5:23730117 | 3                   | 2                    | 6               | 2                    | -                                           |
| Chr9:7117395  | 3                   | 2                    | 6               | 3                    | -                                           |
| Chr7:25788368 | 2                   | 1                    | 10              | 1                    | -                                           |
| Chr5:23730902 | 2                   | 1                    | 6               | 1                    | -                                           |
| Chr4:33507343 | 2                   | 1                    | 6               | 3                    | -                                           |

Supplementary Data 1. Sequence and genotype quality of 272 RILs

| RIL ID | Number of reads | Read depth | Insert size (bp) | Genotyped SNPs (%) | Genome coverage (%) |
|--------|-----------------|------------|------------------|--------------------|---------------------|
| 1      | 23383042        | 6.25       | 132              | 87.90              | 91.98               |
| 2      | 19649656        | 5.25       | 133              | 84.20              | 86.56               |
| 3      | 24519973        | 6.55       | 140              | 91.63              | 94.10               |
| 4      | 21499503        | 5.74       | 136              | 90.76              | 93.01               |
| 5      | 25126024        | 6.71       | 182              | 96.12              | 95.79               |
| 7      | 23157591        | 6.18       | 225              | 95.66              | 96.13               |
| 8      | 27594542        | 7.36       | 168              | 94.71              | 95.76               |
| 9      | 22707096        | 6.00       | 148              | 92.91              | 94.58               |
| 10     | 24009328        | 6.37       | 179              | 89.71              | 91.26               |
| 11     | 32377954        | 8.62       | 167              | 95.01              | 95.98               |
| 12     | 61108623        | 16.29      | 127              | 95.44              | 97.88               |
| 13     | 93999385        | 25.11      | 193              | 98.05              | 98.34               |
| 14     | 22645665        | 6.04       | 148              | 90.81              | 93.00               |
| 15     | 26750643        | 7.13       | 232              | 97.10              | 96.76               |
| 16     | 83610864        | 22.36      | 189              | 97.96              | 98.29               |
| 17     | 22677406        | 6.04       | 242              | 93.51              | 95.65               |
| 18     | 15322523        | 4.08       | 249              | 90.86              | 91.46               |
| 19     | 18847153        | 5.03       | 282              | 91.46              | 91.44               |
| 20     | 26666201        | 7.11       | 162              | 96.37              | 97.24               |
| 21     | 17508984        | 4.67       | 207              | 91.83              | 92.88               |
| 22     | 20275855        | 5.41       | 245              | 94.89              | 94.51               |
| 23     | 25951322        | 6.92       | 233              | 96.00              | 96.16               |
| 24     | 39005965        | 10.41      | 201              | 97.79              | 97.70               |
| 25     | 43441599        | 11.61      | 236              | 88.08              | 96.35               |
| 26     | 31456349        | 8.40       | 180              | 93.84              | 95.10               |
| 28     | 29421027        | 7.79       | 183              | 94.80              | 98.20               |
| 29     | 32682445        | 8.71       | 223              | 97.28              | 97.38               |
| 30     | 21871601        | 5.83       | 197              | 94.38              | 94.75               |
| 31     | 21698329        | 5.79       | 188              | 92.61              | 92.77               |
| 33     | 44575202        | 11.90      | 159              | 95.38              | 95.79               |
| 34     | 35150850        | 9.38       | 190              | 95.22              | 95.18               |
| 35     | 27468878        | 7.34       | 167              | 91.98              | 92.41               |
| 36     | 26072772        | 6.96       | 198              | 95.57              | 95.43               |
| 37     | 30617147        | 8.17       | 155              | 94.83              | 95.76               |
| 38     | 26079322        | 6.96       | 150              | 91.48              | 93.34               |
| 39     | 213561900       | 56.82      | 189              | 98.67              | 97.11               |
| 40     | 42973247        | 11.50      | 143              | 95.39              | 97.11               |
| 42     | 37841623        | 10.10      | 166              | 96.18              | 96.89               |
| 43     | 66951148        | 17.91      | 163              | 97.26              | 98.38               |

|    |           |       |     |       |       |
|----|-----------|-------|-----|-------|-------|
| 44 | 28406185  | 7.58  | 174 | 95.60 | 96.56 |
| 45 | 76868954  | 20.55 | 189 | 97.47 | 98.13 |
| 46 | 32165478  | 8.58  | 166 | 94.86 | 96.21 |
| 47 | 76637452  | 20.07 | 172 | 95.95 | 98.61 |
| 48 | 29784259  | 7.60  | 148 | 85.94 | 91.90 |
| 49 | 28659707  | 7.33  | 165 | 88.98 | 95.24 |
| 50 | 21456851  | 5.67  | 166 | 86.68 | 90.86 |
| 51 | 36269823  | 9.62  | 172 | 95.38 | 97.41 |
| 52 | 62261323  | 12.50 | 285 | 98.74 | 98.94 |
| 53 | 27295877  | 6.94  | 155 | 84.40 | 91.81 |
| 54 | 37373844  | 9.79  | 193 | 95.66 | 97.69 |
| 55 | 75974126  | 15.21 | 359 | 99.07 | 99.34 |
| 56 | 26394718  | 7.04  | 138 | 90.78 | 94.27 |
| 57 | 29682198  | 7.92  | 136 | 93.17 | 95.41 |
| 58 | 28436831  | 7.58  | 143 | 93.37 | 96.44 |
| 59 | 41356663  | 10.86 | 187 | 96.95 | 97.87 |
| 60 | 99703532  | 26.46 | 170 | 98.79 | 98.91 |
| 61 | 23932167  | 6.35  | 174 | 90.23 | 92.79 |
| 62 | 28110933  | 7.50  | 180 | 95.94 | 97.27 |
| 63 | 34190172  | 9.11  | 190 | 96.73 | 98.13 |
| 64 | 26400851  | 6.94  | 199 | 96.64 | 97.79 |
| 65 | 28549775  | 7.52  | 162 | 95.24 | 98.03 |
| 66 | 39729325  | 10.56 | 194 | 97.39 | 98.82 |
| 67 | 23763652  | 6.31  | 186 | 86.41 | 88.94 |
| 68 | 31098605  | 8.29  | 166 | 95.77 | 97.39 |
| 69 | 35833676  | 9.55  | 217 | 97.68 | 98.18 |
| 70 | 49843480  | 9.98  | 379 | 97.94 | 98.96 |
| 71 | 43276882  | 11.34 | 193 | 97.73 | 98.82 |
| 72 | 30513166  | 8.12  | 204 | 97.45 | 98.39 |
| 73 | 48059363  | 9.65  | 273 | 98.69 | 99.03 |
| 74 | 33101770  | 8.82  | 186 | 97.09 | 98.56 |
| 75 | 87991934  | 23.26 | 189 | 98.75 | 98.56 |
| 76 | 23262421  | 6.14  | 163 | 91.64 | 96.01 |
| 77 | 18102982  | 4.78  | 138 | 84.60 | 90.17 |
| 78 | 55845392  | 14.84 | 203 | 97.29 | 98.91 |
| 79 | 18152765  | 4.79  | 124 | 79.25 | 84.72 |
| 80 | 37519560  | 7.53  | 290 | 97.58 | 98.85 |
| 81 | 130949579 | 26.25 | 276 | 99.66 | 99.64 |
| 82 | 47660072  | 12.40 | 190 | 97.30 | 98.58 |
| 83 | 57229899  | 12.13 | 231 | 92.05 | 98.30 |
| 84 | 28838585  | 7.57  | 195 | 92.57 | 93.56 |
| 85 | 38269130  | 8.50  | 198 | 93.28 | 98.58 |

|     |           |       |     |       |       |
|-----|-----------|-------|-----|-------|-------|
| 86  | 35582868  | 9.29  | 189 | 95.37 | 97.88 |
| 87  | 38459861  | 10.14 | 168 | 96.93 | 97.88 |
| 88  | 29336797  | 7.69  | 147 | 80.61 | 84.73 |
| 89  | 35671263  | 9.35  | 190 | 97.19 | 98.55 |
| 90  | 135772072 | 27.22 | 281 | 97.47 | 99.14 |
| 91  | 26782782  | 7.08  | 178 | 90.84 | 92.38 |
| 92  | 13667346  | 3.58  | 258 | 83.59 | 86.48 |
| 93  | 34419826  | 9.08  | 176 | 97.36 | 98.44 |
| 94  | 24833902  | 6.44  | 161 | 86.84 | 91.14 |
| 95  | 37113906  | 9.76  | 171 | 93.16 | 96.38 |
| 96  | 35001979  | 9.23  | 171 | 97.50 | 98.37 |
| 97  | 47737567  | 12.73 | 215 | 96.92 | 97.71 |
| 98  | 22765857  | 6.03  | 257 | 94.86 | 95.88 |
| 99  | 108250182 | 28.85 | 173 | 99.13 | 99.38 |
| 100 | 67700116  | 18.05 | 205 | 99.15 | 99.31 |
| 101 | 30323656  | 8.01  | 175 | 96.15 | 97.06 |
| 102 | 18224974  | 4.79  | 168 | 90.16 | 91.42 |
| 103 | 18232002  | 3.98  | 198 | 60.85 | 78.93 |
| 104 | 40963502  | 8.22  | 315 | 92.88 | 98.89 |
| 105 | 101828444 | 26.59 | 182 | 90.69 | 96.08 |
| 106 | 32429653  | 8.48  | 195 | 97.22 | 98.29 |
| 107 | 27792518  | 7.29  | 178 | 82.79 | 85.73 |
| 108 | 150092616 | 31.21 | 170 | 98.16 | 99.18 |
| 109 | 63629812  | 16.79 | 200 | 98.82 | 99.22 |
| 110 | 20892590  | 5.47  | 198 | 87.12 | 91.27 |
| 111 | 65263523  | 17.22 | 192 | 98.31 | 99.31 |
| 112 | 14453939  | 3.84  | 167 | 80.25 | 85.60 |
| 113 | 32373771  | 8.58  | 157 | 93.83 | 96.67 |
| 114 | 99296014  | 19.76 | 223 | 92.41 | 98.34 |
| 115 | 20481128  | 4.11  | 273 | 92.29 | 95.38 |
| 116 | 30640636  | 8.16  | 189 | 96.94 | 98.24 |
| 117 | 31272050  | 8.27  | 183 | 96.55 | 98.14 |
| 118 | 39308552  | 10.44 | 193 | 97.01 | 98.46 |
| 119 | 40099621  | 10.68 | 166 | 96.93 | 98.59 |
| 120 | 40916314  | 10.74 | 213 | 97.66 | 98.72 |
| 121 | 33081747  | 8.67  | 189 | 93.16 | 98.33 |
| 122 | 47346337  | 12.54 | 169 | 97.03 | 98.61 |
| 123 | 58596234  | 15.52 | 200 | 98.06 | 98.90 |
| 124 | 36484537  | 8.27  | 214 | 89.83 | 98.36 |
| 125 | 21837719  | 5.77  | 181 | 92.12 | 95.59 |
| 126 | 50553682  | 13.29 | 192 | 94.27 | 96.22 |
| 127 | 56502574  | 11.35 | 278 | 98.15 | 98.69 |

|     |           |       |     |       |       |
|-----|-----------|-------|-----|-------|-------|
| 128 | 45337178  | 11.97 | 196 | 97.91 | 98.89 |
| 129 | 56819652  | 15.03 | 179 | 97.82 | 98.81 |
| 130 | 34315106  | 9.03  | 187 | 93.56 | 95.26 |
| 131 | 24875332  | 4.89  | 199 | 88.63 | 88.45 |
| 132 | 115347450 | 23.13 | 274 | 99.09 | 99.06 |
| 133 | 39141197  | 8.71  | 190 | 72.15 | 88.29 |
| 134 | 35144802  | 9.30  | 169 | 96.83 | 98.35 |
| 135 | 55150684  | 11.07 | 286 | 98.25 | 98.87 |
| 136 | 26893243  | 7.10  | 162 | 95.82 | 97.59 |
| 137 | 31624850  | 8.36  | 164 | 95.53 | 97.54 |
| 138 | 43939999  | 11.46 | 155 | 88.94 | 93.83 |
| 139 | 27085793  | 7.15  | 166 | 95.80 | 97.46 |
| 140 | 61930077  | 16.43 | 164 | 97.96 | 98.75 |
| 141 | 30137263  | 7.98  | 169 | 97.15 | 98.22 |
| 142 | 29439814  | 7.70  | 193 | 84.61 | 86.06 |
| 143 | 31020939  | 8.16  | 189 | 92.54 | 93.05 |
| 144 | 39331854  | 10.31 | 199 | 96.85 | 98.86 |
| 145 | 19352702  | 3.88  | 296 | 92.28 | 94.79 |
| 146 | 32568107  | 8.57  | 182 | 92.51 | 95.78 |
| 147 | 53529738  | 10.75 | 281 | 98.67 | 99.14 |
| 148 | 36252712  | 7.28  | 275 | 92.04 | 98.18 |
| 149 | 22639197  | 5.90  | 192 | 82.98 | 86.06 |
| 150 | 47411849  | 12.51 | 193 | 80.23 | 89.69 |
| 151 | 20854354  | 5.51  | 165 | 94.34 | 96.31 |
| 153 | 63862983  | 13.71 | 182 | 75.03 | 82.98 |
| 154 | 26702546  | 5.36  | 311 | 84.10 | 97.35 |
| 155 | 27643954  | 7.30  | 157 | 93.48 | 96.42 |
| 156 | 105291759 | 27.85 | 170 | 98.59 | 99.30 |
| 157 | 33463390  | 8.77  | 197 | 96.49 | 98.20 |
| 158 | 35287979  | 9.25  | 187 | 97.45 | 98.78 |
| 159 | 40340788  | 10.68 | 179 | 97.56 | 98.23 |
| 160 | 33340181  | 8.78  | 185 | 94.25 | 96.93 |
| 161 | 43348624  | 11.26 | 202 | 90.68 | 94.79 |
| 162 | 69416120  | 18.56 | 171 | 94.38 | 95.96 |
| 163 | 18894011  | 5.01  | 202 | 92.41 | 94.58 |
| 164 | 68030315  | 13.66 | 271 | 98.74 | 99.26 |
| 165 | 24573464  | 6.43  | 239 | 96.32 | 97.82 |
| 166 | 73402701  | 19.45 | 187 | 98.98 | 98.99 |
| 167 | 51338378  | 13.59 | 203 | 96.66 | 97.87 |
| 168 | 57539178  | 15.23 | 238 | 98.44 | 99.19 |
| 169 | 88933904  | 17.82 | 278 | 98.91 | 98.80 |
| 170 | 64007878  | 12.85 | 290 | 98.70 | 99.04 |

|     |           |       |     |       |       |
|-----|-----------|-------|-----|-------|-------|
| 172 | 22520554  | 5.96  | 194 | 84.55 | 89.00 |
| 173 | 48172756  | 12.67 | 189 | 94.92 | 96.45 |
| 174 | 70466470  | 18.39 | 184 | 94.88 | 96.68 |
| 175 | 26465110  | 6.95  | 183 | 80.14 | 82.88 |
| 176 | 46950500  | 12.23 | 186 | 87.70 | 92.72 |
| 177 | 78760465  | 20.95 | 223 | 97.07 | 97.93 |
| 178 | 19785124  | 5.22  | 205 | 94.68 | 96.01 |
| 179 | 19188073  | 5.12  | 210 | 95.51 | 96.77 |
| 180 | 156030354 | 31.28 | 288 | 99.48 | 99.16 |
| 181 | 42745264  | 11.06 | 194 | 86.71 | 90.54 |
| 182 | 40862025  | 10.58 | 192 | 80.51 | 83.72 |
| 183 | 26448467  | 6.99  | 194 | 83.57 | 83.18 |
| 184 | 32929204  | 6.61  | 279 | 96.89 | 98.11 |
| 185 | 29689283  | 7.85  | 172 | 80.46 | 83.28 |
| 186 | 18390542  | 4.81  | 191 | 81.75 | 86.37 |
| 187 | 43806955  | 11.56 | 261 | 97.96 | 98.54 |
| 188 | 29004974  | 5.82  | 290 | 95.39 | 97.70 |
| 189 | 17735883  | 4.69  | 182 | 89.27 | 91.52 |
| 190 | 31285034  | 6.27  | 381 | 96.16 | 98.02 |
| 191 | 16746728  | 4.41  | 198 | 93.88 | 94.89 |
| 192 | 43191518  | 8.67  | 279 | 97.93 | 98.99 |
| 193 | 20183774  | 5.21  | 210 | 86.10 | 92.70 |
| 194 | 131726771 | 26.41 | 266 | 98.76 | 98.95 |
| 195 | 34338281  | 8.98  | 177 | 86.51 | 88.90 |
| 196 | 44872044  | 9.01  | 282 | 97.29 | 98.93 |
| 197 | 50478900  | 13.32 | 183 | 97.20 | 98.05 |
| 198 | 34917371  | 9.24  | 181 | 97.09 | 98.35 |
| 199 | 54282739  | 14.38 | 188 | 97.20 | 98.15 |
| 200 | 22975778  | 6.05  | 184 | 79.26 | 81.08 |
| 201 | 39087788  | 7.85  | 278 | 97.55 | 98.59 |
| 203 | 34036807  | 9.02  | 189 | 90.72 | 94.58 |
| 204 | 19091866  | 5.01  | 197 | 93.80 | 95.31 |
| 205 | 37126800  | 9.86  | 185 | 98.01 | 98.61 |
| 206 | 44748927  | 11.80 | 269 | 98.47 | 98.97 |
| 207 | 45718101  | 12.15 | 193 | 97.72 | 98.91 |
| 208 | 13896308  | 3.50  | 256 | 82.73 | 88.20 |
| 209 | 69461358  | 13.95 | 308 | 98.65 | 98.81 |
| 210 | 24036211  | 6.32  | 204 | 96.75 | 97.34 |
| 211 | 35380498  | 9.31  | 189 | 92.23 | 94.29 |
| 212 | 93023734  | 19.73 | 218 | 97.10 | 99.12 |
| 213 | 23203247  | 6.13  | 171 | 93.58 | 95.16 |
| 214 | 21635749  | 5.72  | 199 | 93.28 | 95.50 |



|     |           |       |     |       |       |
|-----|-----------|-------|-----|-------|-------|
| 215 | 23810036  | 6.27  | 199 | 91.94 | 95.10 |
| 216 | 97717902  | 26.01 | 206 | 95.70 | 98.00 |
| 217 | 24242436  | 6.26  | 172 | 90.39 | 94.33 |
| 218 | 37325947  | 9.87  | 169 | 90.65 | 92.65 |
| 219 | 39216524  | 10.28 | 181 | 95.11 | 97.66 |
| 220 | 35666562  | 7.16  | 330 | 79.94 | 98.40 |
| 221 | 39362569  | 10.40 | 245 | 97.46 | 98.56 |
| 222 | 58183878  | 12.90 | 184 | 97.32 | 98.63 |
| 223 | 116416542 | 23.38 | 290 | 99.24 | 99.17 |
| 224 | 34256204  | 8.92  | 187 | 82.54 | 85.35 |
| 225 | 99788611  | 26.23 | 221 | 90.43 | 92.72 |
| 226 | 33673524  | 8.85  | 199 | 97.40 | 98.00 |
| 227 | 26964409  | 7.17  | 187 | 96.99 | 97.87 |
| 228 | 69982302  | 14.05 | 291 | 98.37 | 98.76 |
| 229 | 32073645  | 8.47  | 179 | 95.77 | 98.46 |
| 230 | 62384302  | 12.52 | 286 | 98.64 | 98.94 |
| 231 | 80771086  | 16.21 | 295 | 98.78 | 98.97 |
| 232 | 81102867  | 16.29 | 267 | 98.25 | 98.82 |
| 233 | 83562405  | 22.08 | 184 | 94.46 | 96.28 |
| 234 | 73428554  | 19.47 | 202 | 99.06 | 99.03 |
| 235 | 31506873  | 8.33  | 193 | 84.76 | 86.43 |
| 236 | 90866634  | 19.34 | 230 | 98.13 | 98.97 |
| 237 | 93911578  | 24.92 | 162 | 99.02 | 99.29 |
| 238 | 43254548  | 8.68  | 285 | 96.64 | 98.46 |
| 239 | 46700347  | 12.36 | 193 | 96.43 | 97.50 |
| 240 | 113833688 | 22.80 | 282 | 99.14 | 99.20 |
| 241 | 44190816  | 11.66 | 174 | 98.48 | 98.60 |
| 242 | 77344062  | 15.53 | 286 | 98.77 | 99.18 |
| 244 | 79107401  | 15.88 | 279 | 98.43 | 99.29 |
| 245 | 56549727  | 14.96 | 177 | 96.27 | 98.62 |
| 246 | 85056700  | 22.52 | 186 | 98.05 | 98.99 |
| 247 | 37941521  | 10.03 | 174 | 96.52 | 98.39 |
| 248 | 36349018  | 7.29  | 291 | 97.45 | 98.31 |
| 249 | 23975384  | 6.36  | 151 | 93.24 | 96.80 |
| 250 | 31455139  | 6.31  | 318 | 96.40 | 98.19 |
| 251 | 28102454  | 7.45  | 181 | 97.42 | 98.44 |
| 252 | 122206896 | 32.37 | 183 | 98.03 | 99.26 |
| 253 | 95174019  | 25.07 | 187 | 92.53 | 98.33 |
| 254 | 97603758  | 25.75 | 155 | 98.03 | 99.02 |
| 255 | 31158156  | 8.26  | 174 | 97.42 | 98.31 |
| 256 | 41501020  | 10.57 | 215 | 95.64 | 98.28 |
| 257 | 16892124  | 4.47  | 156 | 85.22 | 89.97 |

|     |           |       |     |       |       |
|-----|-----------|-------|-----|-------|-------|
| 258 | 16653675  | 4.42  | 177 | 80.85 | 84.17 |
| 259 | 65572096  | 17.40 | 180 | 98.39 | 98.86 |
| 260 | 45829502  | 12.20 | 173 | 95.24 | 97.57 |
| 261 | 78556264  | 16.69 | 193 | 93.91 | 97.96 |
| 262 | 20682120  | 5.46  | 199 | 88.74 | 93.63 |
| 263 | 24724949  | 6.53  | 189 | 82.24 | 83.32 |
| 264 | 16894657  | 4.47  | 188 | 84.01 | 89.05 |
| 265 | 25682293  | 6.48  | 234 | 93.67 | 97.12 |
| 266 | 52930674  | 14.06 | 166 | 98.72 | 99.16 |
| 267 | 22090084  | 5.83  | 179 | 82.05 | 84.65 |
| 268 | 25680448  | 10.18 | 206 | 94.56 | 98.63 |
| 269 | 57990233  | 15.23 | 208 | 86.65 | 88.98 |
| 270 | 34207974  | 9.06  | 156 | 95.99 | 98.29 |
| 271 | 28432635  | 7.54  | 180 | 89.70 | 94.75 |
| 272 | 50939281  | 11.08 | 208 | 91.96 | 97.93 |
| 273 | 106479958 | 28.15 | 163 | 96.83 | 99.00 |
| 274 | 19922818  | 5.22  | 208 | 94.28 | 96.23 |
| 275 | 17847361  | 4.72  | 166 | 81.90 | 87.97 |
| 276 | 24062940  | 6.14  | 155 | 80.86 | 84.70 |
| 277 | 150041504 | 39.31 | 191 | 98.41 | 98.59 |
| 278 | 41017018  | 10.87 | 211 | 93.67 | 98.47 |
| 279 | 99205070  | 21.70 | 211 | 91.17 | 96.77 |
| 280 | 92958817  | 18.65 | 285 | 98.85 | 98.86 |

---

RIL IDs are assigned using plant numbers (1 to 280) of the F2 generation. Five lines have been lost during the process of breeding and three lines have been removed because they are duplicates of other RILs. The lines that has been lost during breeding are 27, 32, 41, 171, and 202. The lines that are duplicates and have been removed are 6 (duplicate of 5), 152 (duplicate of 145), and 243 (duplicate of 278).

Supplementary Data 2. List of *mPing* and *Ping* copy numbers in the RILs

| RIL ID | Total number of <i>mPing</i> | Number of shared parental <i>mPing</i> | Number of other shared <i>mPing</i> | Number of unique <i>mPing</i> | Number of unique homozygous <i>mPing</i> | Number of unique heterozygous <i>mPing</i> | <i>Ping</i> copy number | <i>Pong</i> copy number | <i>Ping</i> code |
|--------|------------------------------|----------------------------------------|-------------------------------------|-------------------------------|------------------------------------------|--------------------------------------------|-------------------------|-------------------------|------------------|
| 1      | 253                          | 176                                    | 49                                  | 28                            | 19                                       | 9                                          | 6                       | 1                       | CDEFGH           |
| 2      | 163                          | 131                                    | 20                                  | 12                            | 10                                       | 2                                          | 3                       | 4                       | CDH              |
| 3      | 303                          | 206                                    | 50                                  | 47                            | 43                                       | 4                                          | 7                       | 3                       | *ABCEFG          |
| 4      | 234                          | 167                                    | 41                                  | 26                            | 23                                       | 3                                          | 5                       | 4                       | CDEFG            |
| 5      | 211                          | 156                                    | 32                                  | 23                            | 18                                       | 5                                          | 3                       | 4                       | FGH              |
| 7      | 247                          | 203                                    | 35                                  | 9                             | 9                                        | 0                                          | 3                       | 3                       | FGH              |
| 8      | 274                          | 190                                    | 34                                  | 50                            | 40                                       | 10                                         | 4                       | 3                       | ABDF             |
| 9      | 214                          | 160                                    | 29                                  | 25                            | 16                                       | 9                                          | 4                       | 3                       | CEFH             |
| 10     | 344                          | 238                                    | 56                                  | 50                            | 39                                       | 11                                         | 5                       | 4                       | ABCDF            |
| 11     | 435                          | 257                                    | 66                                  | 112                           | 97                                       | 15                                         | 7                       | 3                       | ABDEFGH          |
| 12     | 264                          | 231                                    | 32                                  | 1                             | 1                                        | 0                                          | 1                       | 4                       | G                |
| 13     | 464                          | 223                                    | 66                                  | 175                           | 105                                      | 70                                         | 4                       | 4                       | ABGH             |
| 14     | 325                          | 198                                    | 50                                  | 77                            | 48                                       | 29                                         | 6                       | 3                       | *CEFGH           |
| 15     | 375                          | 210                                    | 56                                  | 109                           | 75                                       | 34                                         | 5                       | 4                       | DEFGH            |
| 16     | 283                          | 247                                    | 35                                  | 1                             | 0                                        | 1                                          | 2                       | 3                       | EF               |
| 17     | 229                          | 183                                    | 26                                  | 20                            | 14                                       | 6                                          | 2                       | 4                       | DG               |
| 18     | 260                          | 214                                    | 30                                  | 16                            | 13                                       | 3                                          | 3                       | 4                       | DFG              |
| 19     | 236                          | 175                                    | 40                                  | 21                            | 18                                       | 3                                          | 2                       | 4                       | EG               |
| 20     | 226                          | 176                                    | 34                                  | 16                            | 15                                       | 1                                          | 2                       | 4                       | BD               |
| 21     | 309                          | 207                                    | 45                                  | 57                            | 38                                       | 19                                         | 7                       | 3                       | ABCEFGH          |
| 22     | 309                          | 229                                    | 52                                  | 28                            | 21                                       | 7                                          | 3                       | 3                       | ABC              |
| 23     | 292                          | 219                                    | 38                                  | 35                            | 28                                       | 7                                          | 5                       | 3                       | ABDEF            |
| 24     | 414                          | 248                                    | 60                                  | 106                           | 73                                       | 33                                         | 6                       | 4                       | ABCDFH           |
| 25     | 261                          | 227                                    | 33                                  | 1                             | 1                                        | 0                                          | 1                       | 3                       | D                |
| 26     | 371                          | 256                                    | 52                                  | 63                            | 42                                       | 21                                         | 5                       | 2                       | *DEFG            |

|    |     |     |    |     |    |    |   |   |           |
|----|-----|-----|----|-----|----|----|---|---|-----------|
| 28 | 217 | 169 | 32 | 16  | 15 | 1  | 2 | 4 | CH        |
| 29 | 286 | 199 | 43 | 44  | 22 | 22 | 3 | 4 | CDH       |
| 30 | 306 | 203 | 45 | 58  | 55 | 3  | 6 | 3 | ABEFGH    |
| 31 | 263 | 201 | 39 | 23  | 21 | 2  | 5 | 3 | CEFGH     |
| 33 | 273 | 212 | 47 | 14  | 11 | 3  | 2 | 3 | CD        |
| 34 | 473 | 279 | 84 | 110 | 82 | 28 | 7 | 4 | ABCDEFGFG |
| 35 | 258 | 209 | 41 | 8   | 8  | 0  | 2 | 3 | FH        |
| 36 | 311 | 254 | 45 | 12  | 8  | 4  | 2 | 3 | AB        |
| 37 | 230 | 176 | 29 | 25  | 16 | 9  | 3 | 3 | ABH       |
| 38 | 281 | 222 | 36 | 23  | 19 | 4  | 6 | 3 | CDEFGH    |
| 39 | 234 | 190 | 42 | 2   | 2  | 0  | 0 | 3 | No Ping   |
| 40 | 291 | 238 | 48 | 5   | 5  | 0  | 1 | 4 | D         |
| 42 | 307 | 246 | 45 | 16  | 12 | 4  | 3 | 4 | DEF       |
| 43 | 294 | 234 | 38 | 22  | 21 | 1  | 1 | 4 | C         |
| 44 | 354 | 210 | 59 | 85  | 76 | 9  | 6 | 3 | ABCEFG    |
| 45 | 237 | 199 | 34 | 4   | 4  | 0  | 1 | 3 | E         |
| 46 | 385 | 212 | 54 | 119 | 73 | 46 | 7 | 3 | *ABEFGH   |
| 47 | 252 | 224 | 25 | 3   | 3  | 0  | 1 | 4 | G         |
| 48 | 288 | 173 | 48 | 67  | 54 | 13 | 4 | 1 | ABFG      |
| 49 | 338 | 209 | 47 | 82  | 63 | 19 | 4 | 3 | ABEH      |
| 50 | 295 | 212 | 42 | 41  | 39 | 2  | 6 | 3 | ABCDGH    |
| 51 | 377 | 222 | 63 | 92  | 67 | 25 | 6 | 3 | *ABDEF    |
| 52 | 338 | 273 | 42 | 23  | 16 | 7  | 3 | 4 | CDE       |
| 53 | 249 | 179 | 41 | 29  | 28 | 1  | 3 | 4 | ABD       |
| 54 | 423 | 255 | 57 | 111 | 71 | 40 | 6 | 4 | ABCDGH    |
| 55 | 278 | 205 | 39 | 34  | 21 | 13 | 4 | 3 | DFGH      |
| 56 | 375 | 201 | 57 | 117 | 78 | 39 | 6 | 4 | ABDEFG    |
| 57 | 415 | 256 | 74 | 85  | 54 | 31 | 6 | 3 | CDEFGH    |
| 58 | 309 | 216 | 51 | 42  | 29 | 13 | 5 | 3 | CDEFG     |
| 59 | 371 | 284 | 55 | 32  | 21 | 11 | 3 | 4 | CDG       |

|    |     |     |    |     |    |    |   |   |          |
|----|-----|-----|----|-----|----|----|---|---|----------|
| 60 | 241 | 202 | 35 | 4   | 4  | 0  | 1 | 3 | A        |
| 61 | 288 | 188 | 42 | 58  | 56 | 2  | 5 | 2 | CDEFG    |
| 62 | 392 | 233 | 49 | 110 | 76 | 34 | 5 | 4 | ACEFG    |
| 63 | 388 | 253 | 60 | 75  | 53 | 22 | 3 | 4 | ABC      |
| 64 | 346 | 218 | 56 | 72  | 53 | 19 | 7 | 4 | ABCEFGH  |
| 65 | 352 | 223 | 49 | 80  | 62 | 18 | 6 | 4 | *ABDEF   |
| 66 | 467 | 276 | 71 | 120 | 87 | 33 | 6 | 3 | ABDEFG   |
| 67 | 200 | 166 | 29 | 5   | 2  | 3  | 2 | 3 | CG       |
| 68 | 349 | 217 | 54 | 78  | 56 | 22 | 4 | 3 | AEFG     |
| 69 | 423 | 257 | 68 | 98  | 79 | 19 | 7 | 3 | ABCDEFGG |
| 70 | 368 | 270 | 56 | 42  | 27 | 15 | 4 | 4 | ABDG     |
| 71 | 358 | 229 | 61 | 68  | 44 | 24 | 4 | 4 | ABCE     |
| 72 | 407 | 241 | 69 | 97  | 68 | 29 | 6 | 4 | ABCEFG   |
| 73 | 280 | 194 | 48 | 38  | 30 | 8  | 5 | 4 | ABCFH    |
| 74 | 307 | 224 | 55 | 28  | 23 | 5  | 3 | 4 | ADH      |
| 75 | 321 | 274 | 47 | 0   | 0  | 0  | 1 | 3 | D        |
| 76 | 283 | 211 | 45 | 27  | 19 | 8  | 4 | 3 | BCGH     |
| 77 | 315 | 185 | 56 | 74  | 52 | 22 | 4 | 1 | ABCD     |
| 78 | 411 | 215 | 74 | 122 | 73 | 49 | 4 | 3 | ABCH     |
| 79 | 166 | 137 | 21 | 8   | 7  | 1  | 2 | 1 | DH       |
| 80 | 312 | 208 | 51 | 53  | 41 | 12 | 2 | 4 | BC       |
| 81 | 235 | 189 | 32 | 14  | 4  | 10 | 2 | 4 | CH       |
| 82 | 259 | 199 | 37 | 23  | 18 | 5  | 3 | 4 | EFG      |
| 83 | 399 | 237 | 66 | 96  | 67 | 29 | 5 | 4 | ABCEF    |
| 84 | 305 | 245 | 45 | 15  | 11 | 4  | 4 | 3 | CEFH     |
| 85 | 217 | 155 | 29 | 33  | 29 | 4  | 3 | 3 | EFG      |
| 86 | 353 | 257 | 54 | 42  | 26 | 16 | 5 | 4 | BCEFG    |
| 87 | 375 | 244 | 52 | 79  | 58 | 21 | 4 | 4 | ABCG     |
| 88 | 330 | 229 | 48 | 53  | 51 | 2  | 5 | 3 | ABDEH    |
| 89 | 290 | 183 | 42 | 65  | 47 | 18 | 4 | 3 | EFGH     |

|     |     |     |    |     |    |    |   |   |          |
|-----|-----|-----|----|-----|----|----|---|---|----------|
| 90  | 395 | 247 | 57 | 91  | 58 | 33 | 6 | 3 | CDEFGH   |
| 91  | 332 | 265 | 43 | 24  | 20 | 4  | 3 | 4 | CGH      |
| 92  | 341 | 187 | 64 | 90  | 61 | 29 | 5 | 4 | ABEFG    |
| 93  | 288 | 214 | 44 | 30  | 21 | 9  | 4 | 4 | *BGH     |
| 94  | 341 | 218 | 51 | 72  | 63 | 9  | 5 | 4 | ABEFG    |
| 95  | 341 | 258 | 52 | 31  | 31 | 0  | 5 | 4 | ABFGH    |
| 96  | 380 | 214 | 54 | 112 | 89 | 23 | 7 | 3 | ABCDEFGH |
| 97  | 373 | 275 | 59 | 39  | 28 | 11 | 3 | 4 | ABG      |
| 98  | 382 | 265 | 61 | 56  | 47 | 9  | 3 | 3 | CDH      |
| 99  | 303 | 259 | 41 | 3   | 2  | 1  | 1 | 4 | D        |
| 100 | 215 | 192 | 22 | 1   | 0  | 1  | 1 | 3 | D        |
| 101 | 262 | 174 | 45 | 43  | 33 | 10 | 5 | 3 | CDFGH    |
| 102 | 165 | 110 | 31 | 24  | 21 | 3  | 2 | 4 | CH       |
| 103 | 216 | 155 | 39 | 22  | 20 | 2  | 3 | 2 | ABH      |
| 104 | 317 | 212 | 54 | 51  | 44 | 7  | 4 | 4 | *ABH     |
| 105 | 356 | 202 | 52 | 102 | 83 | 19 | 6 | 3 | ABEFGH   |
| 106 | 283 | 239 | 41 | 3   | 2  | 1  | 0 | 4 | No Ping  |
| 107 | 260 | 169 | 38 | 53  | 44 | 9  | 4 | 1 | ABDH     |
| 108 | 298 | 231 | 37 | 30  | 26 | 4  | 3 | 3 | CDH      |
| 109 | 278 | 203 | 42 | 33  | 23 | 10 | 3 | 4 | CDH      |
| 110 | 366 | 288 | 55 | 23  | 20 | 3  | 3 | 3 | ABC      |
| 111 | 305 | 204 | 57 | 44  | 34 | 10 | 3 | 4 | EGH      |
| 112 | 254 | 155 | 48 | 51  | 34 | 17 | 5 | 3 | ABEFH    |
| 113 | 345 | 227 | 64 | 54  | 38 | 16 | 3 | 4 | ABC      |
| 114 | 245 | 190 | 31 | 24  | 23 | 1  | 2 | 4 | EF       |
| 115 | 233 | 176 | 27 | 30  | 28 | 2  | 3 | 3 | BDG      |
| 116 | 281 | 201 | 41 | 39  | 24 | 15 | 3 | 3 | CDH      |
| 117 | 384 | 197 | 71 | 116 | 82 | 34 | 5 | 4 | ABEFG    |
| 118 | 375 | 223 | 60 | 92  | 70 | 22 | 6 | 3 | CDEFGH   |
| 119 | 357 | 212 | 59 | 86  | 42 | 44 | 4 | 3 | ABCH     |

|     |     |     |    |     |     |    |   |   |          |
|-----|-----|-----|----|-----|-----|----|---|---|----------|
| 120 | 485 | 235 | 72 | 178 | 96  | 82 | 6 | 3 | ABCEFG   |
| 121 | 359 | 188 | 50 | 121 | 86  | 35 | 5 | 4 | ABCGH    |
| 122 | 373 | 213 | 65 | 95  | 68  | 27 | 5 | 3 | ACEFG    |
| 123 | 261 | 202 | 37 | 22  | 13  | 9  | 2 | 4 | AB       |
| 124 | 270 | 191 | 58 | 21  | 15  | 6  | 6 | 4 | ABEFGH   |
| 125 | 274 | 211 | 42 | 21  | 18  | 3  | 3 | 3 | BCD      |
| 126 | 354 | 231 | 51 | 72  | 53  | 19 | 5 | 3 | ABCGH    |
| 127 | 406 | 252 | 56 | 98  | 69  | 29 | 6 | 3 | ABCDEG   |
| 128 | 358 | 241 | 63 | 54  | 42  | 12 | 3 | 4 | ABC      |
| 129 | 240 | 212 | 26 | 2   | 2   | 0  | 0 | 4 | No Ping  |
| 130 | 331 | 220 | 55 | 56  | 40  | 16 | 5 | 3 | ABCGH    |
| 131 | 328 | 239 | 48 | 41  | 29  | 12 | 5 | 3 | ABDFG    |
| 132 | 368 | 267 | 54 | 47  | 19  | 28 | 3 | 3 | CDF      |
| 133 | 404 | 263 | 72 | 69  | 65  | 4  | 7 | 3 | ABCDEFGG |
| 134 | 427 | 257 | 59 | 111 | 76  | 35 | 6 | 3 | ABCDEH   |
| 135 | 386 | 232 | 63 | 91  | 51  | 40 | 6 | 3 | ABCEFG   |
| 136 | 466 | 271 | 75 | 120 | 90  | 30 | 5 | 4 | ABDEF    |
| 137 | 416 | 262 | 75 | 79  | 59  | 20 | 3 | 3 | ABH      |
| 138 | 287 | 208 | 47 | 32  | 30  | 2  | 5 | 4 | ABCGH    |
| 139 | 239 | 195 | 32 | 12  | 11  | 1  | 2 | 4 | CG       |
| 140 | 275 | 239 | 27 | 9   | 9   | 0  | 1 | 3 | H        |
| 141 | 289 | 222 | 31 | 36  | 28  | 8  | 2 | 4 | DG       |
| 142 | 380 | 216 | 62 | 102 | 72  | 30 | 6 | 2 | ABDEFH   |
| 143 | 373 | 299 | 48 | 26  | 21  | 5  | 5 | 3 | CDEFG    |
| 144 | 462 | 201 | 65 | 196 | 138 | 58 | 6 | 4 | ABDEFG   |
| 145 | 204 | 147 | 26 | 31  | 27  | 4  | 4 | 3 | ABEH     |
| 146 | 415 | 239 | 70 | 106 | 83  | 23 | 4 | 4 | ABDE     |
| 147 | 291 | 214 | 37 | 40  | 19  | 21 | 3 | 3 | DEG      |
| 148 | 374 | 242 | 55 | 77  | 49  | 28 | 3 | 4 | CFG      |
| 149 | 303 | 182 | 54 | 67  | 52  | 15 | 3 | 4 | *GH      |

|     |     |     |    |     |    |    |   |   |         |
|-----|-----|-----|----|-----|----|----|---|---|---------|
| 150 | 358 | 231 | 77 | 50  | 40 | 10 | 3 | 2 | ABH     |
| 151 | 339 | 229 | 35 | 75  | 45 | 30 | 4 | 3 | ABCG    |
| 153 | 354 | 219 | 54 | 81  | 67 | 14 | 6 | 4 | ABDFGH  |
| 154 | 338 | 250 | 64 | 24  | 9  | 15 | 3 | 3 | DGH     |
| 155 | 376 | 269 | 40 | 67  | 49 | 18 | 7 | 3 | ABDEFGH |
| 156 | 261 | 228 | 25 | 8   | 8  | 0  | 1 | 3 | H       |
| 157 | 382 | 276 | 60 | 46  | 41 | 5  | 4 | 3 | CFGH    |
| 158 | 374 | 224 | 62 | 88  | 73 | 15 | 3 | 3 | ACH     |
| 159 | 485 | 251 | 93 | 141 | 95 | 46 | 5 | 4 | ABCDG   |
| 160 | 378 | 285 | 42 | 51  | 41 | 10 | 6 | 3 | ABCEF   |
| 161 | 258 | 204 | 32 | 22  | 20 | 2  | 2 | 3 | CD      |
| 162 | 319 | 238 | 38 | 43  | 35 | 8  | 3 | 4 | EFG     |
| 163 | 269 | 202 | 32 | 35  | 32 | 3  | 6 | 4 | ABCEFG  |
| 164 | 306 | 216 | 40 | 50  | 32 | 18 | 4 | 4 | AIEFG   |
| 165 | 289 | 227 | 36 | 26  | 21 | 5  | 3 | 4 | EFG     |
| 166 | 237 | 213 | 24 | 0   | 0  | 0  | 1 | 3 | H       |
| 167 | 455 | 280 | 57 | 118 | 94 | 24 | 5 | 4 | ABDFG   |
| 168 | 266 | 206 | 39 | 21  | 9  | 12 | 3 | 4 | CGH     |
| 169 | 309 | 223 | 40 | 46  | 29 | 17 | 4 | 4 | ACDH    |
| 170 | 351 | 262 | 44 | 45  | 33 | 12 | 5 | 3 | CDEFG   |
| 172 | 307 | 236 | 38 | 33  | 24 | 9  | 4 | 4 | DEFG    |
| 173 | 283 | 222 | 32 | 29  | 24 | 5  | 2 | 3 | DH      |
| 174 | 233 | 138 | 37 | 58  | 43 | 15 | 7 | 4 | *ABDEFH |
| 175 | 432 | 269 | 59 | 104 | 81 | 23 | 7 | 1 | *ABCDGH |
| 176 | 448 | 290 | 59 | 99  | 79 | 20 | 4 | 3 | ABCE    |
| 177 | 270 | 196 | 36 | 38  | 22 | 16 | 4 | 4 | CEFG    |
| 178 | 336 | 228 | 49 | 59  | 42 | 17 | 5 | 3 | CDEFG   |
| 179 | 178 | 147 | 29 | 2   | 2  | 0  | 1 | 4 | B       |
| 180 | 368 | 271 | 43 | 54  | 33 | 21 | 4 | 3 | ABCH    |
| 181 | 335 | 227 | 43 | 65  | 53 | 12 | 3 | 3 | ABH     |



|     |     |     |    |     |    |    |   |   |          |
|-----|-----|-----|----|-----|----|----|---|---|----------|
| 182 | 294 | 220 | 35 | 39  | 33 | 6  | 3 | 3 | EGH      |
| 183 | 281 | 197 | 35 | 49  | 40 | 9  | 4 | 2 | ABFH     |
| 184 | 309 | 200 | 38 | 71  | 55 | 16 | 5 | 3 | ABCGH    |
| 185 | 321 | 192 | 50 | 79  | 39 | 40 | 6 | 4 | ABDFGH   |
| 186 | 316 | 215 | 45 | 56  | 45 | 11 | 6 | 2 | ABCFGH   |
| 187 | 335 | 216 | 46 | 73  | 40 | 33 | 3 | 4 | BCH      |
| 188 | 283 | 236 | 33 | 14  | 9  | 5  | 3 | 3 | DGH      |
| 189 | 309 | 223 | 38 | 48  | 38 | 10 | 8 | 3 | *ABCEFGH |
| 190 | 312 | 231 | 35 | 46  | 30 | 16 | 4 | 4 | ABDH     |
| 191 | 303 | 234 | 39 | 30  | 23 | 7  | 5 | 3 | CEFGH    |
| 192 | 341 | 250 | 33 | 58  | 40 | 18 | 4 | 3 | ABCE     |
| 193 | 262 | 224 | 33 | 5   | 5  | 0  | 2 | 3 | CF       |
| 194 | 417 | 272 | 51 | 94  | 66 | 28 | 6 | 4 | ACDEFG   |
| 195 | 261 | 209 | 32 | 20  | 15 | 5  | 2 | 3 | CG       |
| 196 | 392 | 234 | 56 | 102 | 65 | 37 | 5 | 3 | ABEFG    |
| 197 | 359 | 228 | 50 | 81  | 54 | 27 | 6 | 3 | ACDEFG   |
| 198 | 426 | 291 | 58 | 77  | 63 | 14 | 7 | 4 | ABCDEFGH |
| 199 | 227 | 186 | 24 | 17  | 12 | 5  | 2 | 3 | EG       |
| 200 | 296 | 230 | 36 | 30  | 25 | 5  | 4 | 3 | BDEF     |
| 201 | 421 | 249 | 60 | 112 | 81 | 31 | 6 | 3 | ABCEFG   |
| 203 | 315 | 223 | 39 | 53  | 41 | 12 | 5 | 4 | BDEFG    |
| 204 | 325 | 271 | 38 | 16  | 11 | 5  | 3 | 3 | CDF      |
| 205 | 343 | 237 | 44 | 62  | 39 | 23 | 5 | 4 | DEFGH    |
| 206 | 232 | 194 | 24 | 14  | 14 | 0  | 2 | 4 | CF       |
| 207 | 498 | 284 | 72 | 142 | 86 | 56 | 7 | 3 | ABDEFGH  |
| 208 | 163 | 117 | 23 | 23  | 19 | 4  | 3 | 2 | BDH      |
| 209 | 448 | 280 | 50 | 118 | 72 | 46 | 4 | 3 | ABFG     |
| 210 | 189 | 159 | 23 | 7   | 5  | 2  | 2 | 4 | DH       |
| 211 | 360 | 210 | 64 | 86  | 73 | 13 | 5 | 4 | *ABDH    |
| 212 | 349 | 229 | 43 | 77  | 59 | 18 | 3 | 4 | BDH      |

|     |     |     |     |     |    |    |   |   |          |
|-----|-----|-----|-----|-----|----|----|---|---|----------|
| 213 | 281 | 213 | 28  | 40  | 30 | 10 | 4 | 3 | ABCD     |
| 214 | 312 | 211 | 44  | 57  | 49 | 8  | 4 | 4 | ABEF     |
| 215 | 299 | 232 | 35  | 32  | 24 | 8  | 4 | 4 | CDGH     |
| 216 | 439 | 241 | 102 | 96  | 79 | 17 | 6 | 3 | ABCDGH   |
| 217 | 372 | 241 | 40  | 91  | 61 | 30 | 5 | 3 | ABCEG    |
| 218 | 371 | 242 | 54  | 75  | 62 | 13 | 4 | 3 | ABCH     |
| 219 | 298 | 196 | 41  | 61  | 50 | 11 | 4 | 4 | ABEF     |
| 220 | 440 | 261 | 110 | 69  | 26 | 43 | 7 | 4 | ABCDEFGH |
| 221 | 429 | 235 | 64  | 130 | 70 | 60 | 7 | 3 | *ABEFGH  |
| 222 | 346 | 209 | 55  | 82  | 37 | 45 | 5 | 4 | ABFGH    |
| 223 | 360 | 195 | 56  | 109 | 49 | 60 | 6 | 3 | CDEFGH   |
| 224 | 318 | 209 | 40  | 69  | 57 | 12 | 3 | 4 | DGH      |
| 225 | 317 | 264 | 40  | 13  | 13 | 0  | 2 | 3 | CD       |
| 226 | 312 | 254 | 34  | 24  | 9  | 15 | 3 | 3 | ABD      |
| 227 | 216 | 178 | 26  | 12  | 10 | 2  | 2 | 4 | DE       |
| 228 | 357 | 262 | 49  | 46  | 31 | 15 | 6 | 4 | BDEFGH   |
| 229 | 392 | 276 | 53  | 63  | 41 | 22 | 4 | 4 | ABCG     |
| 230 | 239 | 206 | 31  | 2   | 1  | 1  | 1 | 3 | C        |
| 231 | 189 | 162 | 24  | 3   | 3  | 0  | 1 | 4 | H        |
| 232 | 417 | 278 | 51  | 88  | 64 | 24 | 4 | 3 | ABEF     |
| 233 | 374 | 245 | 42  | 87  | 68 | 19 | 3 | 4 | ABE      |
| 234 | 284 | 241 | 33  | 10  | 4  | 6  | 1 | 4 | C        |
| 235 | 359 | 257 | 49  | 53  | 42 | 11 | 5 | 3 | ABEFG    |
| 236 | 332 | 225 | 51  | 56  | 47 | 9  | 5 | 3 | ABEFG    |
| 237 | 216 | 185 | 28  | 3   | 2  | 1  | 1 | 3 | H        |
| 238 | 302 | 256 | 34  | 12  | 12 | 0  | 1 | 4 | G        |
| 239 | 299 | 174 | 50  | 75  | 52 | 23 | 7 | 3 | ABDEFGH  |
| 240 | 297 | 225 | 38  | 34  | 29 | 5  | 4 | 4 | CDFG     |
| 241 | 271 | 170 | 36  | 65  | 41 | 24 | 5 | 3 | CEFGH    |
| 242 | 436 | 237 | 65  | 134 | 69 | 65 | 4 | 4 | ABCH     |

|     |     |     |    |     |    |    |   |   |         |
|-----|-----|-----|----|-----|----|----|---|---|---------|
| 244 | 310 | 236 | 37 | 37  | 29 | 8  | 2 | 3 | AB      |
| 245 | 379 | 264 | 42 | 73  | 42 | 31 | 4 | 4 | CEFH    |
| 246 | 285 | 220 | 31 | 34  | 26 | 8  | 4 | 4 | EFGH    |
| 247 | 381 | 247 | 52 | 82  | 59 | 23 | 5 | 4 | ABDEF   |
| 248 | 350 | 214 | 59 | 77  | 57 | 20 | 6 | 4 | *ABFGH  |
| 249 | 312 | 246 | 42 | 24  | 21 | 3  | 2 | 3 | DE      |
| 250 | 345 | 205 | 48 | 92  | 67 | 25 | 4 | 4 | ABDH    |
| 251 | 257 | 216 | 28 | 13  | 12 | 1  | 2 | 3 | EF      |
| 252 | 347 | 246 | 46 | 55  | 36 | 19 | 5 | 3 | CDFGH   |
| 253 | 351 | 210 | 65 | 76  | 55 | 21 | 5 | 4 | ABCEH   |
| 254 | 261 | 226 | 30 | 5   | 5  | 0  | 1 | 4 | D       |
| 255 | 324 | 212 | 53 | 59  | 51 | 8  | 6 | 4 | ABCDEF  |
| 256 | 284 | 220 | 32 | 32  | 26 | 6  | 2 | 4 | DH      |
| 257 | 276 | 191 | 41 | 44  | 35 | 9  | 5 | 1 | ABEFG   |
| 258 | 252 | 201 | 26 | 25  | 23 | 2  | 4 | 3 | ABDG    |
| 259 | 217 | 184 | 32 | 1   | 0  | 1  | 1 | 3 | H       |
| 260 | 339 | 230 | 52 | 57  | 47 | 10 | 6 | 3 | ABCEFH  |
| 261 | 409 | 267 | 64 | 78  | 62 | 16 | 7 | 4 | ABCDFGH |
| 262 | 311 | 239 | 37 | 35  | 29 | 6  | 2 | 4 | BD      |
| 263 | 324 | 236 | 44 | 44  | 38 | 6  | 4 | 3 | ABDH    |
| 264 | 333 | 250 | 40 | 43  | 37 | 6  | 6 | 4 | ABCEFG  |
| 265 | 208 | 187 | 18 | 3   | 2  | 1  | 1 | 4 | H       |
| 266 | 257 | 202 | 39 | 16  | 9  | 7  | 2 | 4 | CH      |
| 267 | 368 | 250 | 49 | 69  | 42 | 27 | 3 | 3 | ADE     |
| 268 | 240 | 205 | 24 | 11  | 11 | 0  | 1 | 3 | E       |
| 269 | 351 | 272 | 43 | 36  | 34 | 2  | 2 | 3 | CD      |
| 270 | 411 | 197 | 82 | 132 | 96 | 36 | 6 | 4 | **EFGH  |
| 271 | 397 | 222 | 63 | 112 | 90 | 22 | 7 | 3 | ABCDEFH |
| 272 | 266 | 228 | 31 | 7   | 3  | 4  | 2 | 4 | EH      |
| 273 | 369 | 209 | 69 | 91  | 73 | 18 | 4 | 4 | ABEF    |

|     |     |     |    |     |    |    |   |   |          |
|-----|-----|-----|----|-----|----|----|---|---|----------|
| 274 | 287 | 211 | 30 | 46  | 30 | 16 | 3 | 3 | ABH      |
| 275 | 294 | 225 | 38 | 31  | 25 | 6  | 4 | 3 | ABDG     |
| 276 | 370 | 200 | 61 | 109 | 80 | 29 | 4 | 1 | CEFH     |
| 277 | 282 | 243 | 34 | 5   | 2  | 3  | 2 | 3 | AD       |
| 278 | 444 | 239 | 81 | 124 | 86 | 38 | 8 | 4 | ABCDEFGH |
| 279 | 362 | 224 | 53 | 85  | 61 | 24 | 6 | 3 | ABCEGH   |
| 280 | 432 | 291 | 68 | 73  | 57 | 16 | 4 | 4 | ABCG     |

---

*Ping* code: Chr1:2640500..2640502 (*PingA*); Chr1:4220010..4220012 (*PingB*); Chr3:28019800..28019802 (*PingC*);  
 Chr7:26460307..26460309 (*PingD*); Chr9:10863118..10863120 (*PingE*); Chr9:13736141..13736143 (*PingF*);  
 Chr9:16690612..16690614 (*PingG*); Chr6:23521641..23526981 (*PingH*, Nipponbare *Ping*); New *Ping* (\*)

Supplementary Data 3. List of excisions and footprints at parental *mPing* loci

| <i>mPing</i> loci | Number of excisions | Number of excisions with footprints | Number of RILs with excisions | Number of RILs with footprints | Footprints (number of RILs) |
|-------------------|---------------------|-------------------------------------|-------------------------------|--------------------------------|-----------------------------|
| Chr1:10903901     | 0                   | 0                                   | 0                             | 0                              | NA                          |
| Chr1:11226135     | 1                   | 0                                   | 1                             | 0                              | Perfect(1)                  |
| Chr1:1132975      | 0                   | 0                                   | 0                             | 0                              | NA                          |
| Chr1:12249228     | 1                   | 0                                   | 1                             | 0                              | Perfect(1)                  |
| Chr1:13935275     | 0                   | 0                                   | 0                             | 0                              | NA                          |
| Chr1:14047376     | 0                   | 0                                   | 0                             | 0                              | NA                          |
| Chr1:1715117      | 1                   | 0                                   | 1                             | 0                              | Perfect(1)                  |
| Chr1:17513834     | 1                   | 1                                   | 1                             | 1                              | I_TGTGACACAG(1)             |
| Chr1:18989742     | 2                   | 2                                   | 2                             | 2                              | D_4-D_2(1);I_GACC(1)        |
| Chr1:21351851     | 0                   | 0                                   | 0                             | 0                              | NA                          |
| Chr1:21565700     | 0                   | 0                                   | 0                             | 0                              | NA                          |
| Chr1:22415370     | 0                   | 0                                   | 0                             | 0                              | NA                          |
| Chr1:23332547     | 2                   | 1                                   | 2                             | 1                              | D_22(1);Perfect(1)          |
| Chr1:24082898     | 0                   | 0                                   | 0                             | 0                              | NA                          |
| Chr1:24610175     | 0                   | 0                                   | 0                             | 0                              | NA                          |
| Chr1:24779771     | 2                   | 1                                   | 2                             | 1                              | I_A(1);Perfect(1)           |
| Chr1:25256701     | 1                   | 1                                   | 1                             | 1                              | D_2(1)                      |
| Chr1:25261112     | 0                   | 0                                   | 0                             | 0                              | NA                          |
| Chr1:25680936     | 0                   | 0                                   | 0                             | 0                              | NA                          |
| Chr1:28356229     | 0                   | 0                                   | 0                             | 0                              | NA                          |
| Chr1:28924285     | 0                   | 0                                   | 0                             | 0                              | NA                          |
| Chr1:29276379     | 0                   | 0                                   | 0                             | 0                              | NA                          |
| Chr1:29322743     | 1                   | 1                                   | 1                             | 1                              | I_AAAACGAGGAT(1)            |
| Chr1:29328836     | 2                   | 1                                   | 2                             | 1                              | D_7(1);Perfect(1)           |

|               |   |   |    |    |                                                                |
|---------------|---|---|----|----|----------------------------------------------------------------|
| Chr1:29494572 | 5 | 4 | 7  | 4  | D_17(1);D_6(1);I_A(1);I_AA(1);Perfect<br>(3)                   |
| Chr1:29926801 | 1 | 0 | 1  | 0  | Perfect(1)                                                     |
| Chr1:29931517 | 2 | 1 | 3  | 2  | D_9(2);Perfect(1)                                              |
| Chr1:30895565 | 0 | 0 | 0  | 0  | NA                                                             |
| Chr1:31556970 | 0 | 0 | 0  | 0  | NA                                                             |
| Chr1:32293360 | 1 | 0 | 1  | 0  | Perfect(1)                                                     |
| Chr1:34086312 | 1 | 0 | 1  | 0  | Perfect(1)                                                     |
| Chr1:34281436 | 0 | 0 | 0  | 0  | NA                                                             |
| Chr1:3444992  | 5 | 4 | 8  | 4  | D_8(1);D_5(1);I_TTTTC-I_TC-<br>I_CTTG(1);D_2(1);Perfect(4)     |
| Chr1:34897489 | 0 | 0 | 0  | 0  | NA                                                             |
| Chr1:35465445 | 0 | 0 | 0  | 0  | NA                                                             |
| Chr1:35607599 | 1 | 1 | 1  | 1  | D_2(1)                                                         |
| Chr1:36114224 | 0 | 0 | 0  | 0  | NA                                                             |
| Chr1:36149918 | 0 | 0 | 0  | 0  | NA                                                             |
| Chr1:36267659 | 5 | 4 | 57 | 43 | D_5(40);D_12(1);D_2(1);D_9(1);Perfec<br>t(14)                  |
| Chr1:36270511 | 7 | 6 | 50 | 38 | D_31(1);D_20(32);D_23(2);D_16(1);D<br>_4(1);I_T(1);Perfect(12) |
| Chr1:3780849  | 0 | 0 | 0  | 0  | NA                                                             |
| Chr1:37828361 | 0 | 0 | 0  | 0  | NA                                                             |
| Chr1:38092038 | 0 | 0 | 0  | 0  | NA                                                             |
| Chr1:38674212 | 0 | 0 | 0  | 0  | NA                                                             |
| Chr1:38859876 | 2 | 1 | 2  | 1  | D_5(1);Perfect(1)                                              |
| Chr1:38898352 | 1 | 1 | 1  | 1  | D_17(1)                                                        |
| Chr1:39147394 | 1 | 0 | 1  | 0  | Perfect(1)                                                     |
| Chr1:39212320 | 2 | 1 | 2  | 1  | D_8(1);Perfect(1)                                              |
| Chr1:3929765  | 2 | 2 | 2  | 2  | D_5(1);I_AC(1)                                                 |
| Chr1:39543338 | 2 | 1 | 2  | 1  | D_2-D_9(1);Perfect(1)                                          |

|                |   |   |    |   |                                      |
|----------------|---|---|----|---|--------------------------------------|
| Chr1:39957257  | 0 | 0 | 0  | 0 | NA                                   |
| Chr1:40469772  | 0 | 0 | 0  | 0 | NA                                   |
| Chr1:40641754  | 0 | 0 | 0  | 0 | NA                                   |
| Chr1:4076464   | 3 | 2 | 3  | 2 | D_4(1);D_2(1);Perfect(1)             |
| Chr1:40818575  | 0 | 0 | 0  | 0 | NA                                   |
| Chr1:40832862  | 0 | 0 | 0  | 0 | NA                                   |
| Chr1:4101860   | 2 | 2 | 2  | 2 | D_19(1);I_A(1)                       |
| Chr1:41148511  | 0 | 0 | 0  | 0 | NA                                   |
| Chr1:41818259  | 0 | 0 | 0  | 0 | NA                                   |
| Chr1:42156581  | 0 | 0 | 0  | 0 | NA                                   |
| Chr1:42599829  | 0 | 0 | 0  | 0 | NA                                   |
| Chr1:42930250  | 0 | 0 | 0  | 0 | NA                                   |
| Chr1:6172233   | 2 | 1 | 2  | 1 | D_16(1);Perfect(1)                   |
|                |   |   |    |   | D_2-D_19-                            |
| Chr1:6806761   | 7 | 6 | 10 | 9 | I_A(1);D_13(1);D_12(1);D_4(1);D_3(4) |
|                |   |   |    |   | ;I_TTA(1);Perfect(1)                 |
| Chr1:6816415   | 4 | 3 | 4  | 3 | D_10(1);D_2(1);D_3(1);Perfect(1)     |
| Chr1:6846279   | 1 | 0 | 2  | 0 | Perfect(2)                           |
| Chr1:6864904   | 3 | 2 | 3  | 2 | D_9(1);D_20(1);Perfect(1)            |
| Chr1:7514412   | 1 | 0 | 1  | 0 | Perfect(1)                           |
| Chr1:8479732   | 0 | 0 | 0  | 0 | NA                                   |
| Chr1:8750744   | 0 | 0 | 0  | 0 | NA                                   |
| Chr1:9142465   | 0 | 0 | 0  | 0 | NA                                   |
| Chr1:9581605   | 1 | 0 | 1  | 0 | Perfect(1)                           |
| Chr10:11955070 | 0 | 0 | 0  | 0 | NA                                   |
| Chr10:13102744 | 0 | 0 | 0  | 0 | NA                                   |
| Chr10:13370541 | 0 | 0 | 0  | 0 | NA                                   |
| Chr10:14020306 | 0 | 0 | 0  | 0 | NA                                   |
| Chr10:16851282 | 2 | 1 | 4  | 1 | D_1-D_1-D_3-D_1(1);Perfect(3)        |
| Chr10:17496871 | 0 | 0 | 0  | 0 | NA                                   |

|                |   |   |   |   |                              |
|----------------|---|---|---|---|------------------------------|
| Chr10:18044214 | 0 | 0 | 0 | 0 | NA                           |
| Chr10:18765103 | 1 | 1 | 1 | 1 | I_T(1)                       |
| Chr10:21163118 | 0 | 0 | 0 | 0 | NA                           |
| Chr10:21361206 | 0 | 0 | 0 | 0 | NA                           |
| Chr10:21716391 | 1 | 1 | 1 | 1 | D_1(1)                       |
| Chr10:22510407 | 0 | 0 | 0 | 0 | NA                           |
| Chr10:22578379 | 0 | 0 | 0 | 0 | NA                           |
| Chr10:2734624  | 0 | 0 | 0 | 0 | NA                           |
| Chr10:2854153  | 0 | 0 | 0 | 0 | NA                           |
| Chr10:2854243  | 0 | 0 | 0 | 0 | NA                           |
| Chr10:4007946  | 3 | 2 | 3 | 2 | I_TAAG(1);I_AA(1);Perfect(1) |
| Chr10:4320421  | 0 | 0 | 0 | 0 | NA                           |
| Chr10:6566243  | 0 | 0 | 0 | 0 | NA                           |
| Chr10:6896566  | 0 | 0 | 0 | 0 | NA                           |
| Chr10:9169250  | 1 | 1 | 1 | 1 | D_7-D_4(1)                   |
| Chr11:10797353 | 0 | 0 | 0 | 0 | NA                           |
| Chr11:10863129 | 1 | 1 | 1 | 1 | D_11(1)                      |
| Chr11:14340125 | 0 | 0 | 0 | 0 | NA                           |
| Chr11:14578665 | 0 | 0 | 0 | 0 | NA                           |
| Chr11:14670786 | 1 | 1 | 1 | 1 | D_2(1)                       |
| Chr11:16397045 | 1 | 1 | 1 | 1 | D_7(1)                       |
| Chr11:16894772 | 0 | 0 | 0 | 0 | NA                           |
| Chr11:19084257 | 0 | 0 | 0 | 0 | NA                           |
| Chr11:19939294 | 1 | 0 | 1 | 0 | Perfect(1)                   |
| Chr11:20490425 | 0 | 0 | 0 | 0 | NA                           |
| Chr11:21176364 | 0 | 0 | 0 | 0 | NA                           |
| Chr11:21459184 | 0 | 0 | 0 | 0 | NA                           |
| Chr11:22474609 | 0 | 0 | 0 | 0 | NA                           |
| Chr11:22938098 | 0 | 0 | 0 | 0 | NA                           |
| Chr11:23200105 | 0 | 0 | 0 | 0 | NA                           |



|                |   |   |   |   |                           |
|----------------|---|---|---|---|---------------------------|
| Chr11:24682792 | 0 | 0 | 0 | 0 | NA                        |
| Chr11:25523876 | 0 | 0 | 0 | 0 | NA                        |
| Chr11:26077404 | 1 | 1 | 1 | 1 | D_13(1)                   |
| Chr11:28625682 | 0 | 0 | 0 | 0 | NA                        |
| Chr11:3851785  | 0 | 0 | 0 | 0 | NA                        |
| Chr11:393598   | 0 | 0 | 0 | 0 | NA                        |
| Chr11:4179066  | 1 | 0 | 2 | 0 | Perfect(2)                |
| Chr11:6969696  | 2 | 1 | 4 | 1 | D_1-D_2-I_A(1);Perfect(3) |
| Chr11:714790   | 0 | 0 | 0 | 0 | NA                        |
| Chr11:7473250  | 1 | 1 | 1 | 1 | D_2(1)                    |
| Chr11:7503886  | 2 | 1 | 3 | 1 | D_2(1);Perfect(2)         |
| Chr12:1045463  | 1 | 0 | 1 | 0 | Perfect(1)                |
| Chr12:10612331 | 0 | 0 | 0 | 0 | NA                        |
| Chr12:10822439 | 0 | 0 | 0 | 0 | NA                        |
| Chr12:19177973 | 0 | 0 | 0 | 0 | NA                        |
| Chr12:23877483 | 1 | 0 | 1 | 0 | Perfect(1)                |
| Chr12:24595103 | 1 | 1 | 1 | 1 | D_11(1)                   |
| Chr12:26261130 | 0 | 0 | 0 | 0 | NA                        |
| Chr12:26642870 | 0 | 0 | 0 | 0 | NA                        |
| Chr12:2734541  | 0 | 0 | 0 | 0 | NA                        |
| Chr12:3119686  | 1 | 1 | 1 | 1 | I_CCTCC-I_CT(1)           |
| Chr12:3285787  | 0 | 0 | 0 | 0 | NA                        |
| Chr12:332029   | 0 | 0 | 0 | 0 | NA                        |
| Chr12:3373257  | 0 | 0 | 0 | 0 | NA                        |
| Chr12:3616590  | 0 | 0 | 0 | 0 | NA                        |
| Chr12:4097962  | 0 | 0 | 0 | 0 | NA                        |
| Chr12:4965478  | 0 | 0 | 0 | 0 | NA                        |
| Chr12:6625424  | 0 | 0 | 0 | 0 | NA                        |
| Chr12:7210157  | 0 | 0 | 0 | 0 | NA                        |
| Chr12:839604   | 1 | 1 | 1 | 1 | I_TTA(1)                  |

|               |   |   |    |    |                                      |
|---------------|---|---|----|----|--------------------------------------|
| Chr12:8852564 | 0 | 0 | 0  | 0  | NA                                   |
| Chr12:9350665 | 1 | 0 | 2  | 0  | Perfect(2)                           |
| Chr12:9951106 | 0 | 0 | 0  | 0  | NA                                   |
| Chr2:10076667 | 1 | 1 | 1  | 1  | D_11(1)                              |
| Chr2:1161811  | 0 | 0 | 0  | 0  | NA                                   |
| Chr2:12467700 | 2 | 1 | 3  | 1  | D_3-D_5(1);Perfect(2)                |
| Chr2:13161938 | 0 | 0 | 0  | 0  | NA                                   |
| Chr2:13200714 | 1 | 0 | 2  | 0  | Perfect(2)                           |
| Chr2:14601853 | 4 | 3 | 51 | 43 | D_6(1);D_6(41);D_1-D_5(1);Perfect(8) |
| Chr2:15727562 | 1 | 0 | 56 | 0  | Perfect(56)                          |
| Chr2:1583547  | 1 | 0 | 1  | 0  | Perfect(1)                           |
| Chr2:18534787 | 1 | 0 | 1  | 0  | Perfect(1)                           |
| Chr2:18569683 | 1 | 1 | 2  | 2  | D_8(2)                               |
| Chr2:20000327 | 1 | 0 | 1  | 0  | Perfect(1)                           |
| Chr2:20144823 | 0 | 0 | 0  | 0  | NA                                   |
| Chr2:2025376  | 1 | 1 | 1  | 1  | D_12(1)                              |
| Chr2:20589717 | 2 | 1 | 2  | 1  | D_28(1);Perfect(1)                   |
| Chr2:20722279 | 0 | 0 | 0  | 0  | NA                                   |
| Chr2:21001168 | 0 | 0 | 0  | 0  | NA                                   |
| Chr2:21319934 | 1 | 0 | 1  | 0  | Perfect(1)                           |
| Chr2:21443360 | 0 | 0 | 0  | 0  | NA                                   |
| Chr2:214437   | 0 | 0 | 0  | 0  | NA                                   |
| Chr2:223440   | 2 | 1 | 2  | 1  | D_2(1);Perfect(1)                    |
| Chr2:22478977 | 0 | 0 | 0  | 0  | NA                                   |
| Chr2:22549115 | 0 | 0 | 0  | 0  | NA                                   |
| Chr2:23882557 | 0 | 0 | 0  | 0  | NA                                   |
| Chr2:24014618 | 2 | 1 | 2  | 1  | D_1(1);Perfect(1)                    |
| Chr2:25548875 | 0 | 0 | 0  | 0  | NA                                   |
| Chr2:25969392 | 0 | 0 | 0  | 0  | NA                                   |

|               |   |   |   |   |                                                          |
|---------------|---|---|---|---|----------------------------------------------------------|
| Chr2:26510355 | 0 | 0 | 0 | 0 | NA                                                       |
| Chr2:27162235 | 0 | 0 | 0 | 0 | NA                                                       |
| Chr2:27244610 | 0 | 0 | 0 | 0 | NA                                                       |
| Chr2:27685185 | 1 | 1 | 1 | 1 | D_3(1)                                                   |
| Chr2:28008341 | 1 | 0 | 1 | 0 | Perfect(1)                                               |
| Chr2:28376797 | 0 | 0 | 0 | 0 | NA                                                       |
| Chr2:28662452 | 0 | 0 | 0 | 0 | NA                                                       |
| Chr2:28724476 | 3 | 3 | 4 | 4 | D_10(1);D_3(2);I_A(1)                                    |
| Chr2:28732623 | 4 | 3 | 6 | 5 | D_14(1);D_12(2);D_9(2);Perfect(1)                        |
| Chr2:29244327 | 0 | 0 | 0 | 0 | NA                                                       |
| Chr2:29429219 | 0 | 0 | 0 | 0 | NA                                                       |
| Chr2:29547915 | 2 | 2 | 2 | 2 | D_22(1);D_2-D_1(1)                                       |
| Chr2:29576700 | 0 | 0 | 0 | 0 | NA                                                       |
| Chr2:30104937 | 3 | 2 | 6 | 3 | D_3(2);I_TT(1);Perfect(3)                                |
| Chr2:30104997 | 1 | 1 | 1 | 1 | D_1-D_6(1)                                               |
| Chr2:30934395 | 6 | 5 | 8 | 5 | D_1(1);D_3(1);I_TT(1);I_TTA(1);I_TTA<br>AC(1);Perfect(3) |
| Chr2:31455301 | 1 | 0 | 1 | 0 | Perfect(1)                                               |
| Chr2:31636377 | 0 | 0 | 0 | 0 | NA                                                       |
| Chr2:32397174 | 1 | 0 | 2 | 0 | Perfect(2)                                               |
| Chr2:32572258 | 0 | 0 | 0 | 0 | NA                                                       |
| Chr2:32858536 | 0 | 0 | 0 | 0 | NA                                                       |
| Chr2:32895944 | 0 | 0 | 0 | 0 | NA                                                       |
| Chr2:33871069 | 0 | 0 | 0 | 0 | NA                                                       |
| Chr2:34670530 | 1 | 1 | 1 | 1 | D_21(1)                                                  |
| Chr2:3502594  | 0 | 0 | 0 | 0 | NA                                                       |
| Chr2:3639031  | 0 | 0 | 0 | 0 | NA                                                       |
| Chr2:4314535  | 1 | 1 | 1 | 1 | D_16(1)                                                  |
| Chr2:617949   | 0 | 0 | 0 | 0 | NA                                                       |
| Chr2:7113420  | 1 | 0 | 1 | 0 | Perfect(1)                                               |

|               |   |   |    |    |                     |
|---------------|---|---|----|----|---------------------|
| Chr2:8187917  | 0 | 0 | 0  | 0  | NA                  |
| Chr2:8898160  | 0 | 0 | 0  | 0  | NA                  |
| Chr2:913613   | 0 | 0 | 0  | 0  | NA                  |
| Chr3:10593111 | 0 | 0 | 0  | 0  | NA                  |
| Chr3:10990369 | 0 | 0 | 0  | 0  | NA                  |
| Chr3:11329080 | 1 | 0 | 1  | 0  | Perfect(1)          |
| Chr3:11781493 | 0 | 0 | 0  | 0  | NA                  |
| Chr3:11922190 | 1 | 0 | 1  | 0  | Perfect(1)          |
| Chr3:12036120 | 0 | 0 | 0  | 0  | NA                  |
| Chr3:12067613 | 0 | 0 | 0  | 0  | NA                  |
| Chr3:12409837 | 1 | 0 | 2  | 0  | Perfect(2)          |
| Chr3:1247288  | 0 | 0 | 0  | 0  | NA                  |
| Chr3:12735756 | 2 | 2 | 2  | 2  | D_12(1);I_TTA(1)    |
| Chr3:1299651  | 0 | 0 | 0  | 0  | NA                  |
| Chr3:13027116 | 1 | 1 | 1  | 1  | D_15(1)             |
| Chr3:13281744 | 1 | 0 | 1  | 0  | Perfect(1)          |
| Chr3:13683979 | 0 | 0 | 0  | 0  | NA                  |
| Chr3:14597027 | 0 | 0 | 0  | 0  | NA                  |
| Chr3:15487801 | 1 | 0 | 1  | 0  | Perfect(1)          |
| Chr3:15698486 | 0 | 0 | 0  | 0  | NA                  |
| Chr3:16222140 | 0 | 0 | 0  | 0  | NA                  |
| Chr3:17195960 | 1 | 0 | 1  | 0  | Perfect(1)          |
| Chr3:17575717 | 0 | 0 | 0  | 0  | NA                  |
| Chr3:17642391 | 0 | 0 | 0  | 0  | NA                  |
| Chr3:198572   | 0 | 0 | 0  | 0  | NA                  |
| Chr3:21026572 | 1 | 0 | 1  | 0  | Perfect(1)          |
| Chr3:21360120 | 0 | 0 | 0  | 0  | NA                  |
| Chr3:22701631 | 2 | 1 | 17 | 16 | D_25(16);Perfect(1) |
| Chr3:24436164 | 1 | 0 | 1  | 0  | Perfect(1)          |
| Chr3:24855529 | 2 | 1 | 2  | 1  | D_7(1);Perfect(1)   |

|               |   |   |    |   |                                                                         |
|---------------|---|---|----|---|-------------------------------------------------------------------------|
| Chr3:24920217 | 0 | 0 | 0  | 0 | NA                                                                      |
| Chr3:26028786 | 0 | 0 | 0  | 0 | NA                                                                      |
| Chr3:26753248 | 0 | 0 | 0  | 0 | NA                                                                      |
| Chr3:2675912  | 1 | 0 | 36 | 0 | Perfect(36)                                                             |
| Chr3:28088459 | 1 | 0 | 3  | 0 | Perfect(3)                                                              |
| Chr3:28365657 | 0 | 0 | 0  | 0 | NA                                                                      |
| Chr3:29404858 | 0 | 0 | 0  | 0 | NA                                                                      |
| Chr3:29404901 | 0 | 0 | 0  | 0 | NA                                                                      |
| Chr3:30784687 | 0 | 0 | 0  | 0 | NA                                                                      |
| Chr3:31364757 | 0 | 0 | 0  | 0 | NA                                                                      |
| Chr3:31683285 | 1 | 1 | 1  | 1 | D_1(1)                                                                  |
| Chr3:31890843 | 1 | 1 | 1  | 1 | I_TTC(1)                                                                |
| Chr3:33362073 | 0 | 0 | 0  | 0 | NA                                                                      |
| Chr3:34077806 | 0 | 0 | 0  | 0 | NA                                                                      |
| Chr3:34592545 | 1 | 1 | 1  | 1 | D_3(1)                                                                  |
| Chr3:35176773 | 0 | 0 | 0  | 0 | NA                                                                      |
| Chr3:35894895 | 0 | 0 | 0  | 0 | NA                                                                      |
| Chr3:35945979 | 0 | 0 | 0  | 0 | NA                                                                      |
| Chr3:3623527  | 0 | 0 | 0  | 0 | NA                                                                      |
| Chr3:3804370  | 0 | 0 | 0  | 0 | NA                                                                      |
| Chr3:399055   | 1 | 0 | 1  | 0 | Perfect(1)                                                              |
| Chr3:4377252  | 0 | 0 | 0  | 0 | NA                                                                      |
| Chr3:511329   | 0 | 0 | 0  | 0 | NA                                                                      |
| Chr3:5504299  | 0 | 0 | 0  | 0 | NA                                                                      |
| Chr3:6154020  | 0 | 0 | 0  | 0 | NA                                                                      |
| Chr3:6328408  | 1 | 0 | 1  | 0 | Perfect(1)                                                              |
| Chr3:6441699  | 8 | 7 | 19 | 8 | D_18(2);D_6(1);D_2(1);D_7(1);I_TTAT(1);I_AAATACA(1);D_26(1);Perfect(11) |
| Chr3:6512009  | 1 | 0 | 1  | 0 | Perfect(1)                                                              |

|               |   |   |   |   |                             |
|---------------|---|---|---|---|-----------------------------|
| Chr3:6513589  | 0 | 0 | 0 | 0 | NA                          |
| Chr3:7296367  | 0 | 0 | 0 | 0 | NA                          |
| Chr3:9014023  | 2 | 1 | 2 | 1 | D_1-D_11-D_10(1);Perfect(1) |
| Chr3:9162954  | 0 | 0 | 0 | 0 | NA                          |
| Chr3:9240074  | 1 | 0 | 1 | 0 | Perfect(1)                  |
| Chr3:9427120  | 0 | 0 | 0 | 0 | NA                          |
| Chr3:9568670  | 0 | 0 | 0 | 0 | NA                          |
| Chr3:982231   | 0 | 0 | 0 | 0 | NA                          |
| Chr4:13471891 | 0 | 0 | 0 | 0 | NA                          |
| Chr4:15070775 | 0 | 0 | 0 | 0 | NA                          |
| Chr4:18566524 | 0 | 0 | 0 | 0 | NA                          |
| Chr4:1877633  | 0 | 0 | 0 | 0 | NA                          |
| Chr4:19021060 | 0 | 0 | 0 | 0 | NA                          |
| Chr4:19471782 | 0 | 0 | 0 | 0 | NA                          |
| Chr4:19922773 | 0 | 0 | 0 | 0 | NA                          |
| Chr4:19999252 | 0 | 0 | 0 | 0 | NA                          |
| Chr4:20249932 | 0 | 0 | 0 | 0 | NA                          |
| Chr4:21600764 | 1 | 1 | 1 | 1 | I_A(1)                      |
| Chr4:21673101 | 0 | 0 | 0 | 0 | NA                          |
| Chr4:21998764 | 2 | 2 | 2 | 2 | D_23(1);I_TTTAAGATCTAATC(1) |
| Chr4:23199000 | 0 | 0 | 0 | 0 | NA                          |
| Chr4:23439376 | 1 | 0 | 1 | 0 | Perfect(1)                  |
| Chr4:23571130 | 0 | 0 | 0 | 0 | NA                          |
| Chr4:24208721 | 0 | 0 | 0 | 0 | NA                          |
| Chr4:25029910 | 0 | 0 | 0 | 0 | NA                          |
| Chr4:26020117 | 0 | 0 | 0 | 0 | NA                          |
| Chr4:26982348 | 0 | 0 | 0 | 0 | NA                          |
| Chr4:27475745 | 0 | 0 | 0 | 0 | NA                          |
| Chr4:28289923 | 0 | 0 | 0 | 0 | NA                          |
| Chr4:28739797 | 0 | 0 | 0 | 0 | NA                          |

|               |    |   |    |   |                                                                                                  |
|---------------|----|---|----|---|--------------------------------------------------------------------------------------------------|
| Chr4:28903396 | 0  | 0 | 0  | 0 | NA                                                                                               |
| Chr4:29218325 | 0  | 0 | 0  | 0 | NA                                                                                               |
| Chr4:29603863 | 1  | 1 | 1  | 1 | D_1-D_4-D_8(1)                                                                                   |
| Chr4:30320688 | 1  | 0 | 1  | 0 | Perfect(1)                                                                                       |
| Chr4:30513997 | 0  | 0 | 0  | 0 | NA                                                                                               |
| Chr4:31677002 | 0  | 0 | 0  | 0 | NA                                                                                               |
| Chr4:31997420 | 1  | 1 | 1  | 1 | D_8(1)                                                                                           |
| Chr4:32326935 | 1  | 0 | 1  | 0 | Perfect(1)                                                                                       |
| Chr4:33017281 | 0  | 0 | 0  | 0 | NA                                                                                               |
| Chr4:33021868 | 0  | 0 | 0  | 0 | NA                                                                                               |
| Chr4:33507343 | 2  | 1 | 6  | 3 | D_8(3);Perfect(3)                                                                                |
| Chr4:33861550 | 1  | 0 | 1  | 0 | Perfect(1)                                                                                       |
| Chr4:34302847 | 0  | 0 | 0  | 0 | NA                                                                                               |
| Chr4:34688306 | 0  | 0 | 0  | 0 | NA                                                                                               |
| Chr4:35244614 | 0  | 0 | 0  | 0 | NA                                                                                               |
| Chr4:35421806 | 0  | 0 | 0  | 0 | NA                                                                                               |
| Chr4:35422419 | 0  | 0 | 0  | 0 | NA                                                                                               |
| Chr5:14154610 | 1  | 0 | 1  | 0 | Perfect(1)                                                                                       |
| Chr5:1441039  | 0  | 0 | 0  | 0 | NA                                                                                               |
| Chr5:14654628 | 0  | 0 | 0  | 0 | NA                                                                                               |
| Chr5:14878712 | 1  | 0 | 1  | 0 | Perfect(1)                                                                                       |
| Chr5:15210313 | 9  | 8 | 18 | 9 | D_25(1);D_12(1);D_15(1);I_A-<br>D_3(1);D_17(2);I_CAATCAAATT(1);I_<br>TT(1);I_A(1);Perfect(9)     |
| Chr5:15213006 | 10 | 9 | 14 | 9 | D_11-<br>D_23(1);D_23(1);D_15(1);D_9(1);D_7(<br>1);D_9(1);D_12(1);I_TTA(1);D_1(1);Pe<br>rfect(5) |
| Chr5:15488460 | 0  | 0 | 0  | 0 | NA                                                                                               |
| Chr5:15586258 | 0  | 0 | 0  | 0 | NA                                                                                               |

|               |   |   |   |   |                                |
|---------------|---|---|---|---|--------------------------------|
| Chr5:15698449 | 0 | 0 | 0 | 0 | NA                             |
| Chr5:16364136 | 0 | 0 | 0 | 0 | NA                             |
| Chr5:16615709 | 0 | 0 | 0 | 0 | NA                             |
| Chr5:18747498 | 0 | 0 | 0 | 0 | NA                             |
| Chr5:19143339 | 1 | 0 | 1 | 0 | Perfect(1)                     |
| Chr5:19328618 | 1 | 0 | 1 | 0 | Perfect(1)                     |
| Chr5:19961220 | 2 | 1 | 2 | 1 | D_6(1);Perfect(1)              |
| Chr5:20117985 | 1 | 0 | 1 | 0 | Perfect(1)                     |
| Chr5:21633282 | 0 | 0 | 0 | 0 | NA                             |
| Chr5:22056644 | 0 | 0 | 0 | 0 | NA                             |
| Chr5:22235594 | 1 | 0 | 1 | 0 | Perfect(1)                     |
| Chr5:22646609 | 1 | 0 | 1 | 0 | Perfect(1)                     |
| Chr5:226600   | 1 | 0 | 1 | 0 | Perfect(1)                     |
| Chr5:23257994 | 0 | 0 | 0 | 0 | NA                             |
| Chr5:23730117 | 3 | 2 | 6 | 2 | I_A(1);I_ATTG(1);Perfect(4)    |
| Chr5:23730902 | 2 | 1 | 6 | 1 | D_29(1);Perfect(5)             |
| Chr5:24878619 | 0 | 0 | 0 | 0 | NA                             |
| Chr5:25474861 | 1 | 1 | 1 | 1 | D_1(1)                         |
| Chr5:25536621 | 0 | 0 | 0 | 0 | NA                             |
| Chr5:25546566 | 2 | 1 | 2 | 1 | D_3-D_1-I_A-I_C(1);Perfect(1)  |
| Chr5:26247575 | 0 | 0 | 0 | 0 | NA                             |
| Chr5:28151164 | 0 | 0 | 0 | 0 | NA                             |
| Chr5:28927631 | 0 | 0 | 0 | 0 | NA                             |
| Chr5:4249078  | 0 | 0 | 0 | 0 | NA                             |
| Chr5:5370456  | 1 | 0 | 1 | 0 | Perfect(1)                     |
| Chr5:6164428  | 2 | 1 | 2 | 1 | D_4(1);Perfect(1)              |
| Chr5:772694   | 2 | 1 | 2 | 1 | I_TTATCTCTGAATGT(1);Perfect(1) |
| Chr6:10360943 | 0 | 0 | 0 | 0 | NA                             |
| Chr6:13737618 | 0 | 0 | 0 | 0 | NA                             |
| Chr6:14533008 | 2 | 1 | 3 | 1 | I_G(1);Perfect(2)              |



|               |   |   |   |   |                           |
|---------------|---|---|---|---|---------------------------|
| Chr6:14790333 | 1 | 0 | 1 | 0 | Perfect(1)                |
| Chr6:17106306 | 1 | 0 | 1 | 0 | Perfect(1)                |
| Chr6:18136422 | 0 | 0 | 0 | 0 | NA                        |
| Chr6:18886270 | 0 | 0 | 0 | 0 | NA                        |
| Chr6:2035335  | 2 | 2 | 2 | 2 | D_11(1);I_AATCAGTGTCTG(1) |
| Chr6:20717707 | 0 | 0 | 0 | 0 | NA                        |
| Chr6:21010525 | 0 | 0 | 0 | 0 | NA                        |
| Chr6:22646015 | 0 | 0 | 0 | 0 | NA                        |
| Chr6:23126474 | 0 | 0 | 0 | 0 | NA                        |
| Chr6:23535331 | 0 | 0 | 0 | 0 | NA                        |
| Chr6:24594639 | 0 | 0 | 0 | 0 | NA                        |
| Chr6:25002506 | 0 | 0 | 0 | 0 | NA                        |
| Chr6:26083883 | 0 | 0 | 0 | 0 | NA                        |
| Chr6:27840591 | 0 | 0 | 0 | 0 | NA                        |
| Chr6:2856376  | 1 | 0 | 1 | 0 | Perfect(1)                |
| Chr6:29048879 | 0 | 0 | 0 | 0 | NA                        |
| Chr6:30049593 | 0 | 0 | 0 | 0 | NA                        |
| Chr6:30099538 | 2 | 2 | 2 | 2 | D_5(1);D_2(1)             |
| Chr6:30293899 | 0 | 0 | 0 | 0 | NA                        |
| Chr6:30450783 | 0 | 0 | 0 | 0 | NA                        |
| Chr6:4093156  | 0 | 0 | 0 | 0 | NA                        |
| Chr6:4729737  | 0 | 0 | 0 | 0 | NA                        |
| Chr6:5711665  | 0 | 0 | 0 | 0 | NA                        |
| Chr6:6151042  | 1 | 1 | 1 | 1 | D_14(1)                   |
| Chr6:6356702  | 0 | 0 | 0 | 0 | NA                        |
| Chr6:6521725  | 0 | 0 | 0 | 0 | NA                        |
| Chr6:6848916  | 0 | 0 | 0 | 0 | NA                        |
| Chr6:7690782  | 0 | 0 | 0 | 0 | NA                        |
| Chr6:8042613  | 1 | 1 | 1 | 1 | I_TT(1)                   |

|               |   |   |    |    |                                         |
|---------------|---|---|----|----|-----------------------------------------|
| Chr6:8316574  | 5 | 5 | 6  | 6  | D_14(1);D_21(2);I_TTA(1);D_10(1);D_5(1) |
| Chr6:8356631  | 0 | 0 | 0  | 0  | NA                                      |
| Chr6:844779   | 0 | 0 | 0  | 0  | NA                                      |
| Chr6:986514   | 0 | 0 | 0  | 0  | NA                                      |
| Chr7:11852825 | 0 | 0 | 0  | 0  | NA                                      |
| Chr7:13481675 | 1 | 1 | 1  | 1  | D_19(1)                                 |
| Chr7:14975641 | 0 | 0 | 0  | 0  | NA                                      |
| Chr7:16023232 | 0 | 0 | 0  | 0  | NA                                      |
| Chr7:17125850 | 0 | 0 | 0  | 0  | NA                                      |
| Chr7:18920532 | 0 | 0 | 0  | 0  | NA                                      |
| Chr7:20152299 | 1 | 1 | 1  | 1  | D_2(1)                                  |
| Chr7:20204538 | 0 | 0 | 0  | 0  | NA                                      |
| Chr7:20615708 | 1 | 1 | 1  | 1  | D_9(1)                                  |
| Chr7:21376225 | 0 | 0 | 0  | 0  | NA                                      |
| Chr7:22060085 | 1 | 0 | 1  | 0  | Perfect(1)                              |
| Chr7:22679547 | 0 | 0 | 0  | 0  | NA                                      |
| Chr7:23009797 | 1 | 1 | 1  | 1  | I_T(1)                                  |
| Chr7:23272150 | 0 | 0 | 0  | 0  | NA                                      |
| Chr7:23752427 | 0 | 0 | 0  | 0  | NA                                      |
| Chr7:23852999 | 2 | 2 | 2  | 2  | D_13(1);I_TAGTA(1)                      |
| Chr7:23898253 | 0 | 0 | 0  | 0  | NA                                      |
| Chr7:24937108 | 0 | 0 | 0  | 0  | NA                                      |
| Chr7:25772025 | 0 | 0 | 0  | 0  | NA                                      |
| Chr7:25788368 | 2 | 1 | 33 | 24 | D_16(24);Perfect(9)                     |
| Chr7:26090554 | 2 | 1 | 2  | 1  | D_20(1);Perfect(1)                      |
| Chr7:26156682 | 1 | 0 | 1  | 0  | Perfect(1)                              |
| Chr7:27443190 | 0 | 0 | 0  | 0  | NA                                      |
| Chr7:28151483 | 0 | 0 | 0  | 0  | NA                                      |
| Chr7:28821663 | 0 | 0 | 0  | 0  | NA                                      |

|               |   |   |   |   |                                                          |
|---------------|---|---|---|---|----------------------------------------------------------|
| Chr7:29015072 | 0 | 0 | 0 | 0 | NA                                                       |
| Chr7:29475470 | 4 | 3 | 6 | 4 | I_TA(1);D_25(2);I_AA(1);Perfect(2)                       |
| Chr7:29484349 | 0 | 0 | 0 | 0 | NA                                                       |
| Chr7:3667745  | 3 | 2 | 4 | 2 | D_17(1);D_2(1);Perfect(2)                                |
| Chr7:4019952  | 0 | 0 | 0 | 0 | NA                                                       |
| Chr7:4560975  | 0 | 0 | 0 | 0 | NA                                                       |
| Chr7:7314674  | 1 | 0 | 1 | 0 | Perfect(1)                                               |
| Chr7:7972038  | 1 | 0 | 1 | 0 | Perfect(1)                                               |
| Chr7:8879928  | 0 | 0 | 0 | 0 | NA                                                       |
| Chr8:1019672  | 0 | 0 | 0 | 0 | NA                                                       |
| Chr8:11403145 | 0 | 0 | 0 | 0 | NA                                                       |
| Chr8:13076782 | 6 | 5 | 6 | 5 | D_15(1);D_14(1);I_C(1);I_AA(1);I_TG<br>AAG(1);Perfect(1) |
| Chr8:13103108 | 1 | 0 | 1 | 0 | Perfect(1)                                               |
| Chr8:14721482 | 0 | 0 | 0 | 0 | NA                                                       |
| Chr8:15387727 | 1 | 0 | 1 | 0 | Perfect(1)                                               |
| Chr8:16683588 | 0 | 0 | 0 | 0 | NA                                                       |
| Chr8:19197271 | 0 | 0 | 0 | 0 | NA                                                       |
| Chr8:19452248 | 0 | 0 | 0 | 0 | NA                                                       |
| Chr8:20442416 | 0 | 0 | 0 | 0 | NA                                                       |
| Chr8:20628372 | 0 | 0 | 0 | 0 | NA                                                       |
| Chr8:20674237 | 0 | 0 | 0 | 0 | NA                                                       |
| Chr8:22948360 | 4 | 4 | 4 | 4 | D_13(1);D_37(1);I_A(1);I_AGAATAGA<br>GGG(1)              |
| Chr8:23290289 | 0 | 0 | 0 | 0 | NA                                                       |
| Chr8:23802328 | 0 | 0 | 0 | 0 | NA                                                       |
| Chr8:24585356 | 0 | 0 | 0 | 0 | NA                                                       |

|               |    |    |    |    | D_9(1);D_8(1);D_20(1);D_15(1);D_8(1);D_13(1);D_11(1);D_3(1);D_4-D_29(1);I_T(1);I_TT(1);D_14-D_4-I_C(1);D_2(1);D_1(1);Perfect(14) |
|---------------|----|----|----|----|----------------------------------------------------------------------------------------------------------------------------------|
| Chr8:24622994 | 15 | 14 | 28 | 14 |                                                                                                                                  |
| Chr8:24830426 | 0  | 0  | 0  | 0  | NA                                                                                                                               |
| Chr8:24965704 | 0  | 0  | 0  | 0  | NA                                                                                                                               |
| Chr8:25236840 | 1  | 0  | 1  | 0  | Perfect(1)                                                                                                                       |
| Chr8:25278859 | 0  | 0  | 0  | 0  | NA                                                                                                                               |
| Chr8:25881178 | 1  | 1  | 1  | 1  | I_TAA(1)                                                                                                                         |
| Chr8:27109715 | 0  | 0  | 0  | 0  | NA                                                                                                                               |
| Chr8:27153071 | 1  | 0  | 1  | 0  | Perfect(1)                                                                                                                       |
| Chr8:28186241 | 0  | 0  | 0  | 0  | NA                                                                                                                               |
| Chr8:458415   | 0  | 0  | 0  | 0  | NA                                                                                                                               |
| Chr8:4712970  | 1  | 1  | 1  | 1  | D_4(1)                                                                                                                           |
| Chr8:737334   | 0  | 0  | 0  | 0  | NA                                                                                                                               |
| Chr8:8581520  | 1  | 0  | 1  | 0  | Perfect(1)                                                                                                                       |
| Chr8:8655022  | 0  | 0  | 0  | 0  | NA                                                                                                                               |
| Chr8:9385127  | 1  | 0  | 1  | 0  | Perfect(1)                                                                                                                       |
| Chr8:973880   | 0  | 0  | 0  | 0  | NA                                                                                                                               |
| Chr8:9778572  | 1  | 1  | 1  | 1  | D_10(1)                                                                                                                          |
| Chr9:14118723 | 0  | 0  | 0  | 0  | NA                                                                                                                               |
| Chr9:15394515 | 0  | 0  | 0  | 0  | NA                                                                                                                               |
| Chr9:15441738 | 1  | 1  | 1  | 1  | I_TT(1)                                                                                                                          |
| Chr9:15873914 | 0  | 0  | 0  | 0  | NA                                                                                                                               |
| Chr9:16024218 | 0  | 0  | 0  | 0  | NA                                                                                                                               |
| Chr9:16330820 | 1  | 1  | 1  | 1  | D_3(1)                                                                                                                           |
| Chr9:16698141 | 0  | 0  | 0  | 0  | NA                                                                                                                               |
| Chr9:17452747 | 0  | 0  | 0  | 0  | NA                                                                                                                               |
| Chr9:17901601 | 0  | 0  | 0  | 0  | NA                                                                                                                               |
| Chr9:18354394 | 0  | 0  | 0  | 0  | NA                                                                                                                               |

|               |   |   |    |   |                               |
|---------------|---|---|----|---|-------------------------------|
| Chr9:18705899 | 2 | 1 | 2  | 1 | I_T(1);Perfect(1)             |
| Chr9:19596969 | 1 | 1 | 1  | 1 | I_T(1)                        |
| Chr9:19832667 | 2 | 1 | 55 | 1 | D_1(1);Perfect(54)            |
| Chr9:20177227 | 1 | 0 | 1  | 0 | Perfect(1)                    |
| Chr9:2094378  | 1 | 0 | 1  | 0 | Perfect(1)                    |
| Chr9:21458344 | 0 | 0 | 0  | 0 | NA                            |
| Chr9:21744263 | 0 | 0 | 0  | 0 | NA                            |
| Chr9:21859387 | 1 | 1 | 1  | 1 | D_7(1)                        |
| Chr9:21884649 | 0 | 0 | 0  | 0 | NA                            |
| Chr9:22186805 | 0 | 0 | 0  | 0 | NA                            |
| Chr9:22706823 | 1 | 0 | 1  | 0 | Perfect(1)                    |
| Chr9:6030900  | 0 | 0 | 0  | 0 | NA                            |
| Chr9:643091   | 0 | 0 | 0  | 0 | NA                            |
| Chr9:694483   | 0 | 0 | 0  | 0 | NA                            |
| Chr9:7117395  | 3 | 2 | 6  | 3 | I_A-D_19(1);D_3(2);Perfect(3) |
| Chr9:7248751  | 1 | 0 | 2  | 0 | Perfect(2)                    |
| Chr9:968867   | 1 | 1 | 1  | 1 | D_3(1)                        |

---

Footprints are represented by insertions (I) or deletions (D) followed by base pairs inserted or length of base pairs deleted. Numbers in parentheses are number of RILs have the same footprint at this locus.

#### Supplementary Data 4. Primers used in this study

| Primers                             | Sequence (5'-3')           |
|-------------------------------------|----------------------------|
| Primers for transposon display      |                            |
| Msel+0                              | GACGATGAGTCCTGAGTAA        |
| Msel+T/A/G/C                        | GACGATGAGTCCTGAGTAAT/A/G/C |
| mPing P1                            | GTAGCCGTGCAATGACACTAG      |
| mPing P2                            | TGACACTAGCCATTGTGACTG      |
| Primers for qRT-PCR                 |                            |
| PingORF1_F                          | CAACAAGACCCAAATTCATGTTTG   |
| PingORF1_R                          | ACTTGGTGGCTGTGGAGATATTGG   |
| PingTPASE_F                         | TACGTATTGTGGACGCATTAGGC    |
| PingTPASE_R                         | CATCAGCACCACTACCAGTAGCC    |
| Actin_F                             | CCAGTGGTCGTACCACAGGTATTG   |
| Actin_R                             | AGTAACCACGCTCCGTCAGG       |
| Primers for validation of excisions |                            |
| RME1F                               | ATAAGCAAGCTAGTTTGGGCCT     |
| RME1R                               | AAAGCTCTAGATTGACGGCCAA     |
| RME2F                               | TGACACTACTGTGACAGCATCC     |
| RME2R                               | TAACCTCACTACCATGTGGCAA     |
| RME3F                               | TGGGAAGTGATGAGGAGGAGAT     |
| RME3R                               | GCGCGGGGGATTAGAATACTTA     |
| RME4F                               | GCACTCCGAAGAAGCAAAAAGT     |
| RME4R                               | GGCCCCGCGATTAGTTACTAAT     |
| RME5F                               | CACTACTCATCAGCAAGGTGGT     |
| RME5R                               | GCTACATGCTACAGTGACGAGA     |
| RME6F                               | GCCGTACGTGGTTTCAGAAAAA     |
| RME6R                               | GGAGAAAAAGGACTAGCTGGCT     |
| RME7F                               | ATCCGATTCTCAGCTCAGCTTC     |
| RME7R                               | CACCATCAGCCAGTACCTTCTT     |
| RME8F                               | TAAACACAACCTTTGTCACGGC     |
| RME8R                               | CCGCAATCAATACCGCATTTCAT    |
| RME9F                               | CCATCCCTTGATCACCCCTAAG     |
| RME9R                               | AACACGAAACAACAGAACACCT     |
| RME10F                              | CAAGATAACTGCCACCAGGAGT     |
| RME10R                              | TGAAGGGTGTTCATGGGATAA      |
| RME11F                              | ATGTTCCATGGGCCAGAGAATT     |
| RME11R                              | TGTGGCCGAGTATATTGGGATG     |
| RME12F                              | CTGTTGTA CTCTTTCTGCTCCA    |
| RME12R                              | TACCGTGCCAAGTGATGAATGA     |
| RME13F                              | AACAAACGATGCTTTCTGCTCC     |
| RME13R                              | ATTTTCTGTGTGCACCGTTCTG     |
| RME14F                              | GCCTCGTCAGAAAAACAGCTTT     |

|        |                         |
|--------|-------------------------|
| RME14R | TGATGAATGGAGTGCTGCTGAT  |
| RME15F | TCAAACACACCTACACGCTGAT  |
| RME15R | GAACTTCCTGTCTCTGCACTCA  |
| RME16F | ATTCTCTTTTCGCTTTGTCTGGC |
| RME16R | TTAATACATGGCCCCACCTGTC  |
| RME17F | GGTGACGTGTTACCAAATACCG  |
| RME17R | GCAGTCTGCGTCCATGATAAAC  |
| RME18F | TGAATGAACCATCTCTCGTGCA  |
| RME18R | TGAATTGGAGCCAGTAGTTGACT |
| RME19F | GGACAGGTGGAGTATTCCCTTG  |
| RME19R | ATTCTTCTCTCCTGCTTGTGGG  |
| RME20F | CAACTTTCATCAGTTGCAGGA   |
| RME20R | GAGGTTGGGAAGAGAGAATGGG  |
| RME21F | ATTTAGGGGAGTGTGTCGTGTC  |
| RME21R | TTCTTCTCCGGGTGTGATGAAG  |
| RME22F | CCAATGGAAGCAGAGGAGGAAT  |
| RME22R | CCACGATCGATGTCACACATTG  |
| RME23F | CTTCCTCTAGATCTAGCCCCGA  |
| RME23R | CATCAACGGATGCAGATGGAAC  |
| RME24F | AATGAGATGAGACAGTGCAGCA  |
| RME24R | TCACTGGCACACACTAGCTTAG  |
| RME25F | TGGGCTCACATGCTAATCAACT  |
| RME25R | CAACCCAGATCTCTTCAGCCTT  |
| RME26F | ACAACCTAGGGTTTAGTGTGCT  |
| RME26R | GATGACACGAGGCTAGGTGAAA  |
| RME27F | AATCAAGTTCGGGAGCTTGGAT  |
| RME27R | TCCATCCAGAACGGCCAATA    |
| RME28F | GCCGCTGCTTTGTTTTACTCTT  |
| RME28R | TTGCATCAATGATGACATGGCA  |
| RME29F | GTTGTCAAGTCGTCAGTTGTCG  |
| RME29R | ACGATACAATTGCCTGGACAGT  |
| RME30F | GTGCGTCCAAAAGGTAGCTTTT  |
| RME30R | ACGATACGAAGGAAGCAGGATC  |

Primers for validation of structural variations associated with *mPing* loci

|           |                          |
|-----------|--------------------------|
| SV22_C1F  | GTGGCATT TTTATCCGGTGCATT |
| SV22_C1R  | TGTGAGAGTGTGAGTGCTTTGT   |
| SV_R26_2F | TCAGTGAACATGGAGAGGGTTG   |
| SV_R26_2R | GCAGACATGGCAGTTTCACTTT   |
| SV_R26R   | TAGCAGACATGGCAGTTTCACT   |
| SV_R22F   | ATGACAAAAGCAGGCAACACTC   |
| SV_R22R   | TATCCTCCAATTTGCCGTCGAA   |

|             |                         |
|-------------|-------------------------|
| SV198_C9aF  | ACCTCTGTCTCCATACCATCCA  |
| SV198_C9aR  | CGGGTGAGAAGGTACATCGAAA  |
| SV198_C9bF  | ACGTGGACCGAATAGGAAACAT  |
| SV198_C9bR  | AGCAACCGTGTTATAGCTGGAA  |
| SV_C1_29LF  | TGCTTGCAGTATACGAGGGTTT  |
| SV_C1_29LR  | ACTCCGGCAAGTCCTAATCAAG  |
| SV_C1_29RF  | GATTTTGAAAGCTGTGGTGGCT  |
| SV_C1_29RR  | GAACACATTATCCGAACCAGCG  |
| SV_C7_10LF  | TGCCACGAAATAGTTAACCCGA  |
| SV_C7_10LR  | CTCACCTGATGCCTGAACGATA  |
| SV_C7_10RF  | GACCAGTGAACAAACAGCAACT  |
| SV_C7_10RR  | TGGAATTGCTAGTGCTGTCTGT  |
| SV_C10_13LF | CCTTGTACTTTTGGCTGGTTCG  |
| SV_C10_13LR | GAGTGATTGATGCCCCGAAAAC  |
| SV_C10_13RF | AGTACTTTGACTTCCCTGTGCT  |
| SV_C10_13RR | TCATGCAAGCGTGTGTTTTGAT  |
| SV_C10_17LF | AACTAAGCGGAGGTAGAAGCAC  |
| SV_C10_17LR | CACAAGCGAAGAAACACTCTGG  |
| SV_C10_17RF | TGGCTGTTCCCTCTTGTCTCTTG |
| SV_C10_17RR | TGACGGCCGATAGTTTAACGAA  |
| SV_C9_22LF  | AAACTGTCGCATCCGATTCTCT  |
| SV_C9_22LR  | TGTCCCCTTTGTGCGATAACTGG |
| SV_C9_22RF  | TAGGTCCAACGCTATGCTGAAG  |
| SV_C9_22RR  | AAAGATGAGGTCCAACGTCACA  |

Primers for genotyping RILs using genome-wide markers developed using *mPing* polymorphysim between HEG4 and Nipponbare

|          |                        |
|----------|------------------------|
| C1_29MF  | AATGTCACCATGGCTCCTGTAG |
| C1_29MR  | GCTTGGGCGTTGTCAAATAAT  |
| C4_26MF  | CTCCTCTCATCTTGCGCCTATG |
| C4_26MR  | GATTCGCGCTTATCCTCCAGTT |
| C6_27MF  | ATGAATCATGGCACTGTCTCGT |
| C6_27MR  | CTGGGAAAGCAGAGTAGTGGTT |
| C7_7MF   | TGGCCGGAGTAGTTTTACAGAG |
| C7_7MR   | CAACTTCTCTCAGGACACGGAA |
| C10_6MF  | GTTGCGGATTTCCCTATCATGC |
| C10_6MR  | AGGCTGAAGTTACTGCTTTGGT |
| C11_7MF  | GTTGCAAGACACAATCCTCCAC |
| C11_7MR  | ATGGCTTTGATCCTCCACTAGC |
| C12_3MF  | AAATTCCGACACTCTCTGGCAT |
| C12_3MR  | GGATGTGCTCCGAATGATGTTG |
| C12_19MF | AGAGACATAGACTTGGCCAACG |



|          |                        |
|----------|------------------------|
| C12_19MR | GAGTACATATGACCGGGGGAAC |
| MADS50F  | AAAAGTGGGTAGTGTTGGCTCT |
| MADS50R  | CTGCTCTTCTTCTTGTCCCAT  |
| 37180F   | GCAGGAGAGTGAACACCAGTAA |
| 37180R   | AACCTTGAATCGGTCGACATGA |
| 3850bF   | ACAGACAGATCGTGATGATGCA |
| 3850bR   | TCAAACCGGCTGAAGATTAGCT |

---
